1  
2  
3  
4  
5  
6  
7  
8  
9  
10  
11  
12  
13  
14  
15  
16  
17  
18  
19  
20

# Systematic dissection of a complex gut bacterial community

Alice G. Cheng<sup>1\*</sup>, Andrés Aranda-Díaz<sup>2\*</sup>, Sunit Jain<sup>3,4</sup>, Feiqiao Yu<sup>3,4</sup>, Mikhail Iakiviak<sup>2,4</sup>, Xiandong Meng<sup>3,4</sup>, Allison Weakley<sup>3, 4</sup>, Advait Patil<sup>2</sup>, Anthony L. Shiver<sup>2</sup>, Adam Deutschbauer<sup>5,6</sup>, Norma Neff<sup>3</sup>, Kerwyn Casey Huang<sup>2,3,4,7†</sup>, Michael A. Fischbach<sup>2,3,4,7†</sup>

<sup>1</sup>Department of Gastroenterology, Stanford University School of Medicine, Stanford, CA 94305, USA

<sup>2</sup>Department of Bioengineering, Stanford University, Stanford, CA 94305, USA

<sup>3</sup>Chan Zuckerberg Biohub, San Francisco, CA 94158, USA

<sup>4</sup>ChEM-H Institute, Stanford University, Stanford, CA 94305, USA

<sup>5</sup>Environmental Genomics and Systems Biology Division, Lawrence Berkeley National Laboratory, Berkeley, CA 94720, USA

<sup>6</sup>Department of Plant and Microbial Biology, University of California, Berkeley, CA 94720, USA

<sup>7</sup>Department of Microbiology and Immunology, Stanford University School of Medicine, Stanford University, Stanford, CA 94305, USA

\*Equal contribution

†Correspondence: [kchuang@stanford.edu](mailto:kchuang@stanford.edu), [fischbach@fischbachgroup.org](mailto:fischbach@fischbachgroup.org)

Lead author: Michael Fischbach ([fischbach@fischbachgroup.org](mailto:fischbach@fischbachgroup.org))

21 **ABSTRACT**

22       Efforts to model the gut microbiome have yielded important insights into the mechanisms of  
23 interspecies interactions, the impact of priority effects on ecosystem dynamics, and the role of diet and  
24 nutrient availability in determining community composition. However, the model communities studied to  
25 date have been defined or complex but not both, limiting their utility. Here, we construct a defined  
26 community of 104 bacterial strains composed of the most common taxa from the human gut microbiota.  
27 By propagating this community in growth media missing one amino acid at a time, we show that branched-  
28 chain amino acids have an outsized impact on community structure and identify a pathway in *Clostridium*  
29 *sporogenes* for generating ATP from arginine. We constructed and propagated the complete set of single-  
30 strain dropout communities, revealing a sparse network of strain-strain interactions including a novel  
31 interaction between *C. sporogenes* and *Lactococcus lactis* driven by metabolism. This work forms a  
32 foundation for studying strain-strain and strain-nutrient interactions in highly complex defined communities,  
33 and it provides a starting point for interrogating the rules of synthetic ecology at the 100+ strain scale.

## 34 INTRODUCTION

35 Model systems have proven invaluable for the development of mechanistic insight in biology (Müller  
36 and Grossniklaus, 2010). Although much has been learned from detailed studies of individual gut  
37 commensal species (Cullen et al., 2015; Cuskin et al., 2015; Sonnenburg et al., 2010; Wexler and  
38 Goodman, 2017), models of the gut microbiome are less well developed (Blasche et al., 2017; Pacheco  
39 and Segrè, 2019; Walter et al., 2018; Widder et al., 2016; Xavier, 2011). Pioneering efforts showed that a  
40 synthetic community can model the impact of diet on the microbiome (Faith et al., 2011), identified genes  
41 required for *Bacteroides thetaiotaomicron* growth in the mouse intestine in the presence of a 15-member  
42 community (Goodman et al., 2009), and demonstrated that complex communities composed of species  
43 isolated from a single donor can stably colonize mice (Goodman et al., 2011). More recently, defined  
44 communities of up to 20 naturally occurring (Abreu et al., 2019; Friedman et al., 2017; Gutiérrez and  
45 Garrido, 2019; Hoek et al., 2016; Medlock et al., 2018; Patnode et al., 2019; Sanchez-Gorostiaga et al.,  
46 2019; Yurtsev et al., 2016) or genetically engineered (Hart et al., 2019; Hsu et al., 2019; Kong et al., 2018;  
47 Mee et al., 2014; Ziesack et al., 2019) bacterial strains have been studied *in vitro* or in mice, revealing  
48 insights into the mechanisms of interspecies interactions. Complex but undefined communities from the  
49 gut, soil, and plants have also been studied in detail, illuminating the role of priority effects and the  
50 environment—especially nutrient availability—in determining community composition and dynamics  
51 (Aranda-Díaz et al., 2020; Goldford et al., 2018; Martínez et al., 2018).

52 Although these studies have provided foundational insights into the ecology of the gut microbiota,  
53 the synthetic communities used have been defined or complex, but not both. An optimal model system  
54 would have both features: Near-native complexity would allow a model microbiome to capture properties  
55 of an ecosystem that are missing from simpler model systems, including emergent phenomena such as  
56 resilience to perturbation (Dethlefsen and Relman, 2011; Ng et al., 2019) and cooperative metabolism  
57 (Morris et al., 2013). Moreover, complex consortia are a promising starting point for *in vivo* studies of the  
58 gut microbiome, for which they are better suited to model community-level phenomena such as immune  
59 modulation and the formation of structured multispecies biofilms.

60 Complete definition (i.e., communities composed entirely of known organisms) would enable  
61 reductionist experiments to probe mechanism. Studies with relatively simple defined communities have  
62 demonstrated the power of strain dropout and gene deletion experiments for probing community function.  
63 The ability to construct communities with defined composition is especially relevant in the context of  
64 experiments testing whether phenotypes can be transferred to germ-free mice via fecal transplant  
65 (Gopalakrishnan et al., 2018; Ridaura et al., 2013; Routy et al., 2018). At present, since transplanted  
66 communities are typically undefined, it is difficult to uncover the mechanisms underlying these phenomena.  
67 A defined model system of sufficient complexity would enable reductionist follow-up experiments, bringing  
68 the gut microbiome in line with other model systems in which mechanistic studies are possible.

69 Here, echoing efforts focused on the plant microbiota (Bai et al., 2015; Carlström et al., 2019;  
70 Lebeis et al., 2015), we constructed a complex defined community that contains the most prevalent  
71 bacterial species in the human gut microbiome. We demonstrate that the assembly of this 104-member  
72 community is reproducible even for very low abundance species. By systematically perturbing this  
73 community and its growth medium, we uncover a set of strain-nutrient and strain-strain (e.g. syntrophic)  
74 interactions that underlie its composition. This work constitutes a starting point for studying complex  
75 synthetic communities at high resolution across orders of magnitude of relative abundance.

76

## 77 RESULTS

### 78 Designing and building a complex synthetic community

79 We set out to design a community consisting of the most common bacterial strains in the human  
80 gut microbiome. We analyzed metagenomic sequence data from the NIH Human Microbiome Project  
81 (HMP) to determine the most prevalent organisms—those that were present in the largest proportion of  
82 subjects, regardless of abundance. Although the HMP is not broadly representative of microbiomes from  
83 diverse geographies and ethnicities (Deschasaux et al., 2018; He et al., 2018; Sonnenburg and  
84 Sonnenburg, 2019), this data set was well suited to our purposes since it was sequenced at very high  
85 depth, enabling us to identify low-abundance organisms that are nevertheless highly prevalent (Kraal et  
86 al., 2014). After rank-ordering bacterial strains by prevalence, we found that ~20% (166/844) were present  
87 in >45% of the HMP subjects. Of these 166 strains, we were able to obtain 99 from culture collections or  
88 individual laboratories (**Figure 1A**). The profiled strains of three additional species were unavailable, so  
89 we used alternative strains of the same species (*Lactococcus lactis* subsp. *lactis* II1403, *Bacteroides*  
90 *xylanisolvens* DSM 18836, and *Megasphaera* sp. DSM 102144). We added two additional strains to enable  
91 downstream experiments: *Ruminococcus bromii* ATCC 27255, a keystone species in polysaccharide  
92 utilization (Ze et al., 2012); and *Clostridium sporogenes* ATCC 15579, a model gut *Clostridium* species for  
93 which genetic tools are available (Dodd et al., 2017; Funabashi et al., 2020; Guo et al., 2019). Together,  
94 these 104 strains resemble the phylogenetic distribution of a typical Western human gut community  
95 (**Figure S1**). Notably, unlike other defined communities used to model the gut microbiome, our consortium  
96 is within ~2-fold of the estimated number of strains in a typical human gut (Faith et al., 2013; Qin et al.,  
97 2010).

98 A streamlined strain growth protocol simplified the assembly of the complete community and single-  
99 strain dropouts. By testing the growth of each strain in a panel of candidate growth media, we identified  
100 two media, at least one of which supports the growth of all 104 strains (**Table S1**). Each culture was  
101 passaged daily 2-3 times with dilution into fresh medium. Growth rates, carrying capacities, and time of  
102 entry into stationary phase varied widely across strains and media; by passaging fast-growing strains more  
103 frequently than slow-growing organisms, we synchronized culture saturation to the extent possible. Before

104 mixing individually cultured strains, we adjusted the volumes of each culture to achieve similar optical  
105 densities. We confirmed that these cultures were pure using metagenomic sequencing and high accuracy  
106 read mapping, as described in the next section.

107

### 108 **Development of a highly accurate metagenomic read-mapping pipeline**

109 Having assembled a community of 104 strains, we next addressed how to quantify the abundance  
110 of each strain accurately, a major challenge in light of our expectation that some strains would be present  
111 at low abundance. Various strains in the community have identical 16S hypervariable sequences, ruling  
112 out 16S amplicon-based methods. We considered designing a custom amplicon-based pipeline, but such  
113 an approach would require the design and validation of new primer sets for future communities, which we  
114 wished to avoid. Instead, we sought to use metagenomic sequencing as a means of quantifying community  
115 composition.

116 To test the performance of existing metagenomic analysis tools, we generated three 'ground truth'  
117 data sets. The first two consisted of simulated reads generated from the assembled genome sequences  
118 of each strain: one in which all 104 strains were equally abundant (to test sensitivity and specificity), and  
119 another in which strain abundance varied over five orders of magnitude (to test dynamic range). The third  
120 set consisted of actual reads derived from sequencing each strain individually using the same protocol on  
121 the same sequencing instrument used for subsequent community analyses. This data set allowed us to  
122 account for biases introduced by library construction and sequencing.

123 We found that metagenomic read mappers based on a combination of Bowtie2 (Langmead and  
124 Salzberg, 2012) and SAMtools (Li et al., 2009) were sensitive but inaccurate: there was substantial mis-  
125 mapping of reads from one strain to others, such that whole-genome sequencing data from an individual  
126 strain was often interpreted as having arisen from multiple strains. Read mis-mapping from any abundant  
127 strain would therefore create noise that exceeds signal from low-abundance strains, degrading accuracy.  
128 In contrast, algorithms that focus on a few universal genes or unique k-mers such as MetaPhlan2 (Truong  
129 et al., 2015), MIDAS (Nayfach et al., 2016), Kraken2/Bracken (Lu et al., 2017; Wood et al., 2019),  
130 IGGsearch (Nayfach et al., 2019), or Sourmash (Titus Brown and Irber, 2016) were generally accurate to  
131 the species level, but since they only use a small fraction of the reads (<1%), their ability to detect low-  
132 abundance or closely related strains is limited.

133 To address these challenges, we developed a new algorithm, NinjaMap (**Figure 2A**). Taking  
134 advantage of the fact that every strain in our community has been sequenced, NinjaMap quantifies strain  
135 abundances with high accuracy across >6 orders of magnitude. In brief, NinjaMap considers every read  
136 from a sample. If a read does not match perfectly to any of the genomes in the community (typically 3-4%  
137 of the reads), it is tabulated but not assigned. If a read has a perfect match to only one strain, it is assigned  
138 unambiguously to that strain. If a read matches more than one strain perfectly, it is temporarily placed in

139 escrow. After all of the unambiguous assignments are made, an initial estimate of the relative abundance  
140 of each strain is computed. Reads in escrow are then fractionally assigned in proportion to the relative  
141 abundance of each strain, normalized by the total size of the genomic regions available for unique mapping  
142 to avoid bias in favor of strains with large or phylogenetically distinct genome sequences. Finally, relative  
143 abundances are computed.

144 To assess the performance of NinjaMap, we performed two tests. First, we assessed the degree  
145 of read mis-mapping from and into each strain's ledger—e.g., we quantified how many reads from  
146 *Bacteroides ovatus* ATCC 8483 were mis-assigned to other strains (which would underestimate its  
147 abundance in a community), and how many reads from other strains were mis-assigned to *B. ovatus* (which  
148 would overestimate its abundance). For simulated reads, most instances of read mis-mapping resulted in  
149 relative abundance errors  $<10^{-4}$  (**Figure S2A**). For actual reads, mis-mapping was more frequent but still  
150 typically below a threshold of  $10^{-3}$ ; most mis-mapping arose from deviations between the database genome  
151 sequence and the actual sequence of the strain in our collection (**Figure S2B**). In general, if the abundance  
152 of a strain in a community was within 10-fold of what would be expected from mis-mapping, we excluded  
153 the strain from analyses (**Methods**).

154 Second, we used Ninjamap to analyze simulated reads from a 104-strain community. We found  
155 that this tool can accurately quantify strains with abundances as low as  $10^{-5}$  in the context of a mixed  
156 community of known composition (**Figure 2B**). Thus, NinjaMap is capable of quantifying strains accurately  
157 over a wide dynamic range of relative abundances.

158

### 159 **Community construction is highly reproducible**

160 Our protocol for assembling communities with >100 members involves several growth passages  
161 and liquid transfer steps, and we were concerned that variability in any step of our protocol could make it  
162 difficult to interpret results. To address this concern, we measured the degree of reproducibility in  
163 community composition data by constructing and propagating the 104-member community multiple times.  
164 We included technical replicates to assess variation in bacterial growth, DNA extraction, and sequencing,  
165 and biological replicates to determine the impact of differences in the preparation of the inocula. We  
166 propagated the communities for 48 h and extracted DNA for sequencing at 0, 12, 24, and 48 h.

167 Despite our attempts to inoculate equal densities of each strain, the range of densities at  $t=0$   
168 spanned several orders of magnitude (**Figure 2B**), with a mean  $\log_{10}$ (relative abundance) of  $-2.5 \pm 0.8$  for  
169 all detectable strains. Nonetheless, 95/104 strains were detectable at  $t=0$ ; the remaining strains were below  
170 the limit of detection or had abundances that could potentially be explained by read mis-mapping. The  
171 communities reached a relatively stable configuration by 12 h (**Figure 2B**), with a remarkable degree of  
172 reproducibility among biological replicates (**Figure 2C**). Technical replicates were even more similar  
173 (**Figure 2D**), indicating that community growth, DNA extraction, and sequencing contributed only modestly

174 to variability. Notably, very low-abundance strains ( $<10^{-4}$ ) were only slightly more variable than high-  
175 abundance strains (**Figure 2C**). Taken together, these results indicate that community composition is  
176 robust to experimental variation.

177

### 178 **A nutrient drop-out screen to map strain-nutrient interactions in the community**

179 We next sought to explore the network of strain-nutrient interactions in the community. Although  
180 much is known about polysaccharide foraging by gut commensals (Martens et al., 2014), far less is known  
181 about amino acid utilization, so we performed the experiment in a defined growth medium (SAAC) from  
182 which we could remove one amino acid at a time. Since amino acids are often utilized in pairs (Nisman,  
183 1954; Smith and Macfarlane, 1997), eliminating one at a time from a complete background rather than  
184 adding one at a time to a null background has a greater potential to reveal phenotypes relevant to  
185 community function. Moreover, performing this screen in the context of a complex community (as opposed  
186 to the traditional practice of analyzing the growth of isolated strains) enables us to study community-  
187 dependent effects such as nutrient competition or mutualism-dependent nutrient utilization.

188 To map strain-amino acid interactions, we constructed the 104-member community by mixing  
189 cultures of each strain propagated in a rich growth medium. We then sub-cultured this consortium in 20  
190 defined growth media, each deficient in a single amino acid; the complete defined medium was used as a  
191 control (**Figure 3A**). Samples were taken at 48 h and metagenomic sequencing data were analyzed to  
192 determine the impact of amino acid deficiency on the relative abundance of each strain.

193

### 194 **Global analysis of strain-amino acid interactions**

195 To identify strain-amino acid interactions, we tabulated strains whose relative abundance deviated  
196 significantly from the mean across conditions, taking advantage of the fact that that most amino acid  
197 dropouts had little effect on most strains (**Figure 3B**, Methods). When the community was propagated in  
198 the complete defined medium, relative abundances spanned  $>6$  orders of magnitude. 36% of the strains  
199 were present at  $10^{-4}$ – $10^{-2}$  relative abundance, 8 strains were  $>10^{-2}$  and 50 were  $<10^{-4}$  (**Figure 3B**).  
200 NinjaMap was sensitive to strains with relative abundances as low as  $10^{-6}$ , enabling us to quantify the 56%  
201 of strains that were below the  $10^{-3}$  limit of detection commonly used for metagenomic analyses (Franzosa  
202 et al., 2015). Our system is therefore capable of studying low-abundance microbes, some of which are  
203 known to have a large biological impact (Buffie et al., 2015; Funabashi et al., 2020).

204 To identify significant responses, we calculated the standard deviation of the relative abundance of  
205 each strain across experiments and computed z-scores (**Figure 3C**). Strain-amino acid interactions that  
206 were previously identified in mono-culture studies were also observed in our community format.  
207 *Anaerostipes caccae*, whose growth is stimulated by methionine (Soto-Martin et al., 2020), decreased in  
208 relative abundance in a community grown in methionine-deficient medium ( $z=-3.48$ ). Likewise, *C.*

209 *sporogenes* was impeded by the absence of leucine ( $z=-2.56$ ), a substrate it oxidatively decarboxylates to  
210 isovalerate to generate electrons (Guo et al., 2019). These observations demonstrate that even though  
211 >100 strains are competing for the same nutrients, the effects of eliminating one amino acid on the growth  
212 of one strain are readily observable in the context of a complex community.

213 Most strains responded to the removal of  $\leq 4$  amino acids. Moreover, relative abundances showed  
214 little variability, with a mean standard deviation of  $\log_{10}(\text{relative abundance})$  across strains  $< 0.43$ . Only  
215 three strains, all of which are Firmicutes, were responsive to more amino acids: *Lactococcus lactis* DSM  
216 20729, *Clostridium sporogenes* ATCC 15579, and *Lactobacillus ruminis* ATCC 25644 (**Figure S3, Table**  
217 **S2**). Thus, under these growth conditions, most strains are largely insensitive to amino acid removal while  
218 a small minority are highly responsive. We note that the response of a strain to amino acid removal may  
219 be direct (e.g. due to utilization for energy) or indirect (e.g. amino acid removal impacts an interacting  
220 strain).

221 In contrast, amino acids varied widely in terms of their impact on community composition (**Figure**  
222 **3D**). More than half of the strains responded to cysteine removal, likely due to its effect as a reducing  
223 agent. More than 5% of the strains responded to methionine, histidine, isoleucine, arginine, valine, and  
224 tyrosine, while for eight amino acids there were no significant changes to the community at all (**Figure 3D**).  
225 Interestingly, there were large differences among similar amino acids: no strains responded to lysine, while  
226 10.6% and 7.6% of the strains responded to histidine and arginine, respectively. The removal of isoleucine,  
227 leucine, and arginine had a particularly large impact on community structure: *C. sporogenes* and *L. lactis*,  
228 the two most abundant strains when grown in complete defined medium, each decreased >500-fold in  
229 relative abundance when any of these amino acids were removed. Thus, certain amino acids are ‘keystone’  
230 nutrients that play an important role in determining community composition.

231

### 232 **C. *sporogenes* uses arginine to generate ATP**

233 Among the 86 candidate strain-amino acid interactions revealed by our screen, we were particularly  
234 intrigued by those involving *C. sporogenes*. Although *C. sporogenes* can oxidize and reduce aromatic  
235 amino acids (Dodd et al., 2017), its relative abundance was unaffected by the removal of phenylalanine,  
236 tyrosine, or tryptophan (**Figure S4**). In contrast, the removal of leucine, isoleucine, and arginine each had  
237 large impact on its fitness in the community. The second strongest phenotype was a decrease in relative  
238 abundance in the absence of arginine (**Figure 3E**); although *C. sporogenes* is known to metabolize  
239 arginine (Venugopal and Nadkarni, 1977; Wildenauer and Winter, 1986), no impact of arginine on growth  
240 or energy metabolism had been observed in prior work. To validate and characterize this interaction, we  
241 compared *C. sporogenes* growth in complete defined versus arginine-deficient medium. Although *C.*  
242 *sporogenes* grew well in complete defined medium, it exhibited a large growth defect in the absence of  
243 arginine (**Figure 3F**), indicating that this amino acid is an important substrate for growth.



244 *C. sporogenes* can use other amino acids as substrates to support ATP synthesis (Dodd et al.,  
245 2017). Hypothesizing that the same is true for arginine, we incubated wild-type *C. sporogenes* in a culture  
246 medium deficient in substrates for ATP synthesis. Upon addition of arginine, intracellular ATP levels rose  
247 sharply (**Figure 3G**), indicating that *C. sporogenes* generates ATP (directly or indirectly) from arginine.

248 To identify the enzymes involved in this process, we parsed the *C. sporogenes* genome for  
249 pathways known to capture energy from arginine. This search yielded candidate genes for each of the  
250 three steps in the arginine deiminase pathway (**Figure 3H**), which catalyzes the net conversion of arginine  
251 to ornithine plus CO<sub>2</sub> and two equivalents of ammonium, generating one equivalent of ATP (Cunin et al.,  
252 1986). Using a method we recently developed to construct scarless deletions in *C. sporogenes* (Guo et  
253 al., 2019), we generated strains deficient in the putative arginine deiminase (CLOSPO\_00894,  $\Delta adi$ ) or  
254 ornithine carbamoyltransferase (CLOSPO\_02415,  $\Delta otc$ ). The  $\Delta otc$  mutant was unable to generate ATP in  
255 response to arginine provision, consistent with a role for the arginine deiminase pathway in *C. sporogenes*  
256 energy production (**Figure 3G**). In contrast, the  $\Delta adi$  mutant showed no defect in arginine-induced ATP  
257 production (**Figure S5A**), suggesting the possibility of an alternative pathway to generate citrulline from  
258 arginine. Consistent with these observations, the  $\Delta otc$  mutant (but not the  $\Delta adi$  mutant) was deficient in  
259 growth in complete defined medium (**Figures 3F, Figure S5B**). The deficiency was partial, suggesting that  
260 an alternative pathway can generate energy from arginine under these conditions. Together, these results  
261 show that arginine metabolism by the arginine deiminase pathway contributes directly to the cellular ATP  
262 pool, augmenting our understanding of how amino acid metabolic pathways contribute to the fitness of a  
263 prominent gut commensal within a complex community.

## 264 **A strain drop-out screen to map strain-strain interactions**

265 Next, we sought to map strain-strain interactions within the community. A wide variety of interaction  
266 types have been characterized (Little et al., 2008; Shank and Kolter, 2009), including mutualistic or  
267 commensal interactions based on nutrient exchange (e.g. syntrophies and secondary fermentation) (Morris  
268 et al., 2013) and antagonistic interactions based on antibiotic production or nutrient competition (Zipperer  
269 et al., 2016). However, relatively little effort has been applied to characterizing strain-strain interactions  
270 systematically; previous efforts have focused on interactions in binary culture (Limoli et al., 2019; Traxler  
271 et al., 2013; Vetsigian et al., 2011), where the rules and selective conditions are likely distinct from those  
272 in a complex community (Bailey et al., 2016).

273 To address this gap in knowledge, we constructed all 104 single-strain dropout communities  
274 (**Figure 4A**, Methods). These 103-member communities as well as the full community were grown in  
275 complete defined medium, and samples were taken at 0 and 48 h to assay growth dynamics over the  
276 course of a single passage (**Table S3**). We quantified the relative abundance of each strain by analyzing  
277 metagenomic sequencing data using NinjaMap.

279 We observed that the relative abundances in our data were correlated due to batch effects arising  
280 from the order in which communities were constructed (**Figure S6**); they clustered naturally into four sets.  
281 The two smallest sets (8 and 12 dropouts) were not considered further due to challenges in evaluating  
282 statistical significance. Within the two larger sets—60 and 24 dropouts—the relative abundances of each  
283 strain across samples were tightly distributed (**Figure 4B, S7**), enabling us to identify statistically significant  
284 responses using z-scores.

285 To test whether the single-strain dropout communities were deficient in the intended strain, we  
286 compared the relative abundance of each strain across all samples (**Figure 4B, Table S3**). For 71 of 84  
287 communities, the strain we intended to remove had  $z < -3$ , indicating that the dropout was successful. In the  
288 remaining 13 communities, the intended strain was either below our limit of detection or was detected at  
289 48 h; in both cases, the corresponding communities were not considered further (**Methods**).

290 Two additional filters were applied, resulting in the removal of six additional samples. First, five  
291 samples that had  $< 10^6$  reads were not considered further due to the underrepresentation of low-abundance  
292 strains. Second, the *E. siraeum* dropout was missing an additional strain, *A. caccae*, and was removed  
293 from further consideration.

294

### 295 **Global analysis of strain-strain interactions**

296 We analyzed the remaining 65 communities (**Table S4**) to identify strains whose relative  
297 abundance changed significantly in response to the absence of another strain. Putative interactions  $a \rightarrow b$   
298 (where the arrow indicates that strain *b* increases or decreases in relative abundance in response to the  
299 absence of strain *a*) were considered further if they had  $|z| > 2$ . We removed potentially spurious interactions  
300 that could have resulted from read mis-mapping or relative abundances near the lower limit of detection  
301 (**Methods**).

302 Despite the community's complexity, large effects could be observed when certain strains were  
303 dropped out. For example, removing *Acidaminococcus sp.* D21 resulted in a 4-fold increase in the  
304 abundance of *Acidaminococcus fermentans* DSM 20731 (**Figure 4B**), presumably reflecting nutrient  
305 competition between strains of the same genus. The relative abundances of *A. fermentans* DSM 20731  
306 were tightly distributed in other samples (**Figure 4A**, inset), so the change in relative abundance due to  
307 *Acidaminococcus sp.* D21 dropout was highly significant ( $z=5.1$ ).

308 Most of the strain dropouts affected  $< 5\%$  of the other strains (**Figure 4C**). However, seven strains—  
309 when dropped out—impacted  $> 10\%$  of the remaining strains positively or negatively. Two of those strains,  
310 *Acidaminococcus sp.* D21 and *A. caccae* DSM 14662, were present at high relative abundance, so it is  
311 not surprising that relative abundances within the community redistribute upon their removal. However, the  
312 remaining strains—*Dorea formicigenerans* ATCC 27755, *Dialister invisus* DSM 15470, *Bacteroides dorei*  
313 5\_1\_36/D4, *B. fragilis* 3\_1\_12, and *C. sporogenes* ATCC 15579—were present at a relative abundance of

314 just  $\sim 10^{-3}$ – $10^{-2}$ , yet their removal altered the relative abundance of >7 other strains (**Figure 4D**).  
315 Conversely, four strains (*Bacteroides* sp. 2\_1\_16, *Bacteroides cellulosilyticus* DSM 14838, *Bacteroides*  
316 *ovatus* ATCC 8483, and *Mitsuokella multacida* DSM 20544) had relative abundances >1% but affected <2  
317 strains when removed (**Figure 4D**), consistent with functional redundancy or another mechanism by which  
318 these strains are insulated from the rest of the community. Thus, the community is largely insensitive to  
319 strain removal even though a small subset of strains exhibit keystone-like properties.

320

### 321 **Validating candidate interactions in binary culture**

322 Next, we tested whether interactions uncovered by the strain dropout screen could be observed in  
323 binary culture. Interactions can be direct or indirect (i.e. involve one or more additional strains), and context-  
324 independent or dependent (i.e. occur only in the background of a complex community). Only those  
325 interactions that are direct and context-independent would be reproducible in binary culture. We focused  
326 on interactions with  $z < -2$  (rather than  $z > 2$ ), since the former involve growth promotion and are therefore  
327 simpler to validate in binary culture (**Table S4**).

328 We selected 32 candidate interactions with highly negative z-scores for further characterization.  
329 For these strain pairs, we compared the optical density of each strain when grown in monoculture versus  
330 co-culture, using the same defined medium as in the dropout screen. 23/32 strain pairs exhibited an  
331 increased carrying capacity relative to an additive growth model (**Figure 4E**) and/or decreased time to  
332 saturation in co-culture (**Figure S8**). These data indicate that the screen is an effective means of  
333 uncovering direct, context-independent strain-strain interactions. For 9/32 strain pairs, no interaction was  
334 observed in binary culture. While these negative results could be due to imperfections in the strain dropout  
335 experiment or analysis, they might also suggest that certain interactions can only be observed in the setting  
336 of a complex community.

337 We were intrigued that the level of *Lactococcus lactis* DSM 20729 decreased when *C. sporogenes*  
338 ATCC 15579 was dropped out of the community ( $z = -2.10$ ). Although the effect size was small, the  
339 distribution of *L. lactis* relative abundances was particularly narrow, so the absence of *C. sporogenes*  
340 disrupted the growth of an otherwise context-insensitive strain.

341 To determine whether this interaction occurred in binary co-culture, we cultured *C. sporogenes* and  
342 *L. lactis* individually or together; *C. sporogenes* grew rapidly in defined medium while *L. lactis* was unable  
343 to grow on its own. The optical density of the co-culture was substantially higher than the sum of the optical  
344 densities of the individual cultures, suggesting that at least one of the strains grew more robustly in co-  
345 culture (**Figure 4F**). By counting colonies from the co-culture, we determined that *C. sporogenes* levels  
346 were unaffected but the density of *L. lactis* increased  $\sim 10$ -fold (**Figure 4G**). These results validate the  
347 postulated interaction between *C. sporogenes* and *L. lactis* and suggest the possibility that the apparent  
348 sensitivity of *L. lactis* to leucine and arginine (**Figure 3E**) may in fact be a response to the drop in relative

349 abundance of *C. sporogenes*. More broadly, our findings show that a growth stimulatory interaction  
350 between two strains can manifest even over one round of growth in the presence of 102 other strains.

351

## 352 **DISCUSSION**

353 Our experimental system has three important features. First, by developing a community that is  
354 both defined and reasonably complex, we have generated a model system that will likely capture much of  
355 the biology of a native microbiome. Future refinements are needed, including additional bacterial strains  
356 to occupy unfilled niches as well as archaea, fungi, and viruses, all of which are important components of  
357 the native ecosystem.

358 Second, the computational pipeline we developed for read mapping makes it possible to analyze  
359 complex defined communities with high precision. Community structure can be quantified across six orders  
360 of magnitude in relative abundance, enabling the interrogation of low-abundance community members that  
361 play an important role in community function and dynamics (Buffie et al., 2015; Funabashi et al., 2020).  
362 The degree of technical and biological reproducibility (**Figure 2E**) is remarkable in a system this complex,  
363 which bodes well for future experimental efforts.

364 Third, the nutrient and strain dropout assays are a powerful format for probing the interactions that  
365 underlie community dynamics. The amino acid dropout screen tested 2,080 potential interactions (104  
366 strains × 20 amino acids) using only 20 metagenomic sequencing samples, and the strain dropout screen  
367 tested 10,712 interactions (104 × 103 strains) using only 104 sequencing samples. Candidate interactions  
368 were observed in the background of a community and are therefore more likely to be relevant under native  
369 conditions; many of them were validated in co-culture experiments (**Figure 4E**). Taken together, our  
370 system for community assembly and measurement establish a framework for rapid, robust experimentation  
371 with complex consortia.

372 In its current form, our approach has two important limitations. First, when propagated *in vitro*, our  
373 community exhibits a different architecture than is observed *in vivo*. The consortium was dominated by  
374 Firmicutes that are typically found at lower relative abundances in the human gut, likely because the  
375 defined growth medium we used (SAAC) is rich in amino acids. Lowering the free amino acid content of  
376 the growth media and adding glycans, complex polypeptides, and host-derived factors such as bile acids  
377 could help steer the community toward a more typical *in vivo* architecture.

378 Second, the scale and complexity of our amino acid and strain dropout experiments precluded the  
379 possibility of carrying out multiple replicates. During the single passage over which communities were  
380 propagated, biomass increased by only 200-fold. As a result, the interactions we identified likely include  
381 some false positives; replicate experiments and additional growth passages could yield a larger or higher  
382 confidence set of interactions. Nonetheless, the strain-amino acid and strain-strain interactions we

383 validated show that the experiments were sufficiently sensitive and reproducible to uncover real  
384 interactions.

385 The properties of this community in the context of host colonization are described in an  
386 accompanying manuscript. Together, these efforts constitute a starting point for a defined, full-scale model  
387 system for the gut microbiome. Such a system would yield great dividends, as the research communities  
388 around yeast, worms, flies, and mice have shown over decades. It would be even more powerful in  
389 conjunction with new genetic tools to manipulate specific members of this community.

390

## 391 **STAR★METHODS**

392 Detailed Methods are provided in the online version of this paper and include the following:

393

- KEY RESOURCES TABLE

394

- RESOURCE AVAILABILITY

395

- Lead contact

396

- Materials availability

397

- Data and code availability

398

- EXPERIMENTAL MODEL AND SUBJECT DETAILS

399

- Bacterial strains and culture conditions

400

- METHOD DETAILS

401

- Metagenomic sequencing

402

- Metagenomic read mapping

403

- Amino-acid dropout experiments

404

- Creation of *C. sporogenes* mutants

405

- ATP assay

406

- Strain-dropout experiments

407

- Pairwise co-culture growth measurements

408

- QUANTIFICATION AND STATISTICAL ANALYSIS

409

## 410 **STAR★METHODS**

### 411 **Lead contact**

412 Further information and requests for resources and reagents should be directed to and will be fulfilled by  
413 the lead contact, Michael Fischbach ([fischbach@fischbachgroup.org](mailto:fischbach@fischbachgroup.org)).

414

### 415 **Materials availability**

416 *C. sporogenes* mutants are available on request. The strains used in this study are available from the  
417 sources listed in the Key Resource Table.

418

## 419 **Data and code availability**

420 Metagenomic and whole-genome sequencing datasets generated for this study will be available at the  
421 Sequence Read Archive at the time of publication. Ninjamap is available at  
422 <https://github.com/FischbachLab/ninjamap> and the associated docker containers are available at  
423 <https://hub.docker.com/orgs/fischbachlab/repositories>.

424

## 425 **EXPERIMENTAL MODEL AND SUBJECT DETAILS**

### 426 **Bacterial strains and culture conditions**

427 Bacterial strains were selected based on metagenomic sequencing data from the NIH Human  
428 Microbiome Project (Kraal et al., 2014). The mean relative abundance and prevalence of each strain were  
429 quantified using the 81 samples from healthy human patients from North America. The ~200 strains that  
430 appeared in  $\geq 37$  of the 81 samples were considered for inclusion in the community. We were able to obtain  
431 104 of these strains from public repositories (Key Resources Table).

432 Strains were cultured in anaerobic conditions (10% CO<sub>2</sub>, 5% H<sub>2</sub>, 85% N<sub>2</sub>) in 2 mL 96-well plates for  
433 24-48 h in their respective growth media (**Table S1**): Mega Medium (McNulty, et. al. 2015) supplemented  
434 with 400  $\mu$ M Vitamin K2, or Chopped Meat Medium supplemented with Mega Medium carbohydrate mix  
435 (McNulty, et. al. 2015) and 400  $\mu$ M Vitamin K2. For strain storage, 200  $\mu$ L of liquid culture was aliquoted  
436 1:1 into sterile 50% glycerol in a 1 mL 96-well plate. The plate was covered with an airtight silicone fitted  
437 plate mat, edges were sealed with O<sub>2</sub>-impervious yellow vinyl tape, and the plate was frozen at -80 °C. To  
438 revive cultures, the storage plate was defrosted in the anaerobic chamber and 100  $\mu$ L from each well was  
439 used to inoculate 900  $\mu$ L of appropriate fresh medium. Twenty-four hours post-revival, each well was  
440 visually inspected and wells that did not exhibit obvious growth were re-inoculated with an additional 100  
441  $\mu$ L of frozen stock. Each storage plate included 3-4 “sentinel” wells containing only growth medium that  
442 were used to monitor potential contamination.

443

## 444 **METHOD DETAILS**

### 445 **Constructing high quality genome assemblies**

446 We obtained the latest RefSeq (O’Leary et al., 2016) assembly for each strain in our community  
447 and assessed its quality based on contig statistics from Quast (Gurevich et al., 2013) v. 5.0.2 and SeqKit  
448 (Shen et al., 2016) v. 0.12.0, using GTDB-tk (Chaumeil et al., 2019) v. 1.2.0 for taxonomic classification.  
449 A linear combination of the completeness and contamination scores (completeness–5×contamination)  
450 derived from the CheckM (Parks et al., 2015) v. 1.1.2 lineage workflow was used along with the other  
451 metrics to include or exclude genomes in the GTDB (Parks et al., 2018, 2020) release 89 database  
452 ([https://gtdb.ecogenomic.org/faq#gtdb\\_selection\\_criteria](https://gtdb.ecogenomic.org/faq#gtdb_selection_criteria)). Genomes that contained any number of Ns,

453 contained over 100 contigs, contained GTDB lineage warnings or multiple matches, or had CheckM  
454 completeness <90, contamination >10, and combination score <90 were resequenced and reassembled.

455 Our hybrid assembly pipeline contains a workflow for *de novo* and reference-guided genome  
456 assembly using both Illumina short reads and PacBio or Nanopore long reads. The workflow has three  
457 main steps: read pre-processing, hybrid assembly, and contig post-processing. Read pre-processing  
458 included 1) quality trimming/filtering (bbduk.sh adapterFile="adapters,phix" k=23, hdist=1, qtrim=rl, ktrim=r,  
459 entropy=0.5, entropywindow=50, entropyk=5, trimq=25, minlen=50), with adaptors and phix removed with  
460 kmer right trimming, kmer size of 23, Hamming distance 1 (allowing one mismatch), quality trimming of  
461 both sides of the read, filtering of reads with an average entropy <0.5 with entropy kmer length of 5 and a  
462 sliding window of 50, trimming to a Q25 quality score, and removal of reads with length <50 bp; 2)  
463 deduplication (bbdupe.sh); 3) coverage normalization (bbnorm.sh min=3) such that depth <3x was  
464 discarded; 4) error correction (tadpole.sh mode=correct); and 5) sampling (reformt.sh). All pre-processing  
465 was carried out using BBtools v. 38.37 for short reads. For long reads, we used fitlong v. 0.2.0 (fitlong --  
466 min\_length 1000 --keep\_percent 90 --length\_weight 10) to discard any read <1 kb and the worst 10% of  
467 read bases, as well as to weigh read length as more important when choosing the best reads. Hybrid  
468 assembly was performed by Unicycler (Wick et al., 2017) v. 0.4.8 with default parameters using pre-  
469 processed reads. After assembly, the contigs from the assembler were scaffolded by LRScaf (Qin et al.,  
470 2018) v. 1.1.9 with default parameters. If the initial assembly did not produce the complete genome, gaps  
471 were filled by long reads TGS-GapCloser (Xu et al., 2019) v. 1.0.1 with default parameters.

472 If no long reads were available, short paired-end reads were assembled *de novo* using SPAdes  
473 (Bankevich et al., 2012) v. 3.13.1 with the --careful option to reduce the number of mismatches and short  
474 indels during assembly of small genomes. Assembly quality was assessed based on the CheckM v. 1.1.2  
475 lineage. If contamination was detected, contigs corresponding to the genome of interest were extracted  
476 from the contaminated assembly using MetaBAT2 (Kang et al., 2019) v. 2.2.14 with default parameters.

477 Finally, the assembled genomes were evaluated using the same criteria as the RefSeq assemblies,  
478 and the assembly for each species with the best overall quality metrics was chosen as the reference  
479 assembly. This procedure resulted in the replacement of eight genomes: two from a PacBio/Illumina hybrid  
480 assembly, one from a Nanopore/Illumina hybrid assembly, one from a reference-guided Illumina assembly,  
481 and four from short-read assemblies of the respective isolate samples followed by binning (**Table S5**).

482

### 483 **Generating simulated sequencing reads**

484 *In silico* data were generated to evaluate the Ninjamap algorithm in the absence of genome  
485 assembly errors and sequencing quality issues. Grinder (Angly et al., 2012) v. 0.5.4 was applied to each  
486 genome to generate error-free reads with the following parameters: -read\_distribution 140, -insert\_size  
487 800, -mate\_orientation FR, -delete\_chars '-~\*NX', -mutation\_dist uniform 0, -random\_seed 1712, -

488 abundance\_model uniform, -qual\_levels 33 31, -fastq\_output 1. The -coverage\_fold parameter was  
489 adjusted based on the cases described below.

490

#### 491 *Uniform abundance isolate dataset*

492 This dataset was created to test the sensitivity and specificity of the algorithm against our database  
493 of genomes. *In silico* data were generated for each genome with uniform coverage of 10X or 100X. We  
494 were able to consistently identify the correct genome regardless of coverage (**Figure 2C**). Some cross  
495 mapping was observed at ~0.01% relative abundance, likely because some genomes in our database  
496 shared more than 99% average nucleotide identity, making cross-mapping unavoidable. Thus, we  
497 generally treat  $10^{-4}$  as a conservative lower bound for confident relative abundance estimation.

498

#### 499 *Variable abundance community dataset*

500 *In silico* reads were generated for each genome at 10X, 0.1X, and 0.001X uniform coverage. Three  
501 datasets of mixed community reads were generated including every genome at a coverage randomly  
502 selected from the three levels. The observed relative abundance of each genome in our database was  
503 calculated using the NinjaMap algorithm and compared to the expected relative abundance based on  
504 coverage level, which ranged from  $\sim 3 \times 10^{-6}$  to 0.03. We could estimate relative abundances accurately for  
505 genomes present at  $>10^{-5}$  (**Figure 2D**). However, for lower relative abundances, we observed some  
506 discrepancies corresponding to the same genomes with mis-mapping against isolate datasets, indicating  
507 that high similarity between genomes begins to confound the algorithm at very low relative abundances.

508

#### 509 **Metagenomic sequencing**

510 The same experimental pipeline was used for sequencing bacterial isolates and synthetic  
511 communities. Bacterial cells were pelleted by centrifugation under anaerobic conditions. Genomic DNA  
512 was extracted using the DNeasy PowerSoil HTP kit (Qiagen) and quantified in 384-well format using the  
513 Quant-iT PicoGreen dsDNA Assay Kit (Thermofisher). Sequencing libraries were generated in 384-well  
514 format using a custom low-volume protocol based on the Nextera XT process (Illumina). Briefly, the  
515 concentration of DNA from each sample was normalized to 0.18 ng/ $\mu$ L using a Mantis liquid handler  
516 (Formulatrix). If the concentration was  $<0.18$  ng/ $\mu$ L, the sample was not diluted further. Tagmentation,  
517 neutralization, and PCR steps of the Nextera XT process were performed on a Mosquito HTS liquid handler  
518 (TTP Labtech), leading to a final volume of 4  $\mu$ L per library. During the PCR amplification step, custom 12-  
519 bp dual unique indices were introduced to eliminate barcode switching, a phenomenon that occurs on  
520 Illumina sequencing platforms with patterned flow cells (Sinha et al., 2017). Libraries were pooled at the  
521 desired relative molar ratios and cleaned up using Ampure XP beads (Beckman) to achieve buffer removal  
522 and library size selection. The cleanup process was used to remove fragments  $<300$  bp or  $>1.5$  kbp. Final



523 library pools were quality-checked for size distribution and concentration using a Fragment Analyzer  
524 (Agilent) and qPCR (BioRad). Sequencing reads were generated using a NovaSeq S4 flow cell or a  
525 NextSeq High Output kit, in 2x150 bp configuration. 5-10 million paired-end reads were targeted for isolates  
526 and 20-30 million paired-end reads for communities.

527

### 528 **Generating and normalizing the NinjaMap database**

529 The first step in the pipeline was to assess the uniqueness of each genome in the community. We  
530 generated error-free *in silico* reads such that each genome was uniformly covered at 10x depth. Each such  
531 genome read set was aligned to all genomes in the community. The uniqueness of a genome was defined  
532 as the fraction of the genome that did not have reads cross-mapped from another strain; uniqueness values  
533 were between 0 and 1, such that more unique genomes have a value closer to 1. The uniqueness value  
534 of a strain was used to normalize its final relative abundance in any community sample. All genome  
535 sequences were combined into one fasta file and a Bowtie2 (Langmead and Salzberg, 2012) v. 2.3.5.1  
536 index was computed for future alignments. The database and strain weights were recomputed each time  
537 the community or a genome was updated.

538

### 539 **Metagenomic read mapping**

540 Paired-end reads from each sample were aligned to the database using Bowtie2 with maximum  
541 insert length (-maxins) 3000, maximum alignments (-k) as 300, suppressed unpaired alignments (--no-  
542 mixed), suppressed discordant alignments (--no-discordant), suppressed output for unaligned reads (--no-  
543 unal), required global alignment (--end-to-end), and using the "--very-sensitive" alignment preset. The  
544 output was processed in Samtools (Li et al., 2009) to convert the alignment output from SAM output stream  
545 to BAM format. The BAM file was sorted and indexed by coordinates.

546

### 547 **NinjaMap alignment scoring**

548 A primary goal of the NinjaMap algorithm is to analyze and tabulate every input read. A successful  
549 match was defined as a read aligned to a genome at 100% identity across 100% of the read length. If a  
550 read was uniquely matched to a single strain, its mate pair was also recruited as long as it had at least one  
551 match to the same strain. If exactly 1 strain was a perfect match for both reads, the pair was considered a  
552 "primary pair" and a score of 1 was given for each read. If >1 or 0 strains were a match for both reads,  
553 both reads were placed in escrow and analyzed separately as described below.

554 By prioritizing paired-read scoring, noise was significantly reduced while ensuring that as many  
555 reads as possible were considered for abundance estimates. Once preliminary strain abundances were  
556 calculated based on primary pairs, reads in escrow were then assigned fractionally to the strains to which  
557 they aligned perfectly. The fractional assignment was calculated based on the primary read abundances

558 of each strain, normalized by the size of the unique region of each genome within the database, such that  
559 the total contribution for a read was 1. In some cases, an individual escrowed read matched to a strain  
560 without any matches to primary pairs; such reads were discarded and not used in the final estimates.

561 Finally, the total score for each strain in the database was normalized by the number of reads that  
562 aligned to the database, so that the relative abundances of all strains summed to 1.

563

### 564 **Amino acid dropout experiments**

565 Strains were passaged by diluting 1:10 into fresh growth medium every 24 h for 2-3 days. The day  
566 before amino acid dropout experiments, cultures were diluted 1:10 into 1 mL of fresh medium and grown  
567 for 24 h as inoculation working stocks. To measure OD<sub>600</sub>, strains were diluted 1:10 into 150  $\mu$ L of the  
568 appropriate culture medium and a plate reader was used to measure absorbance at 600 nm. Stocks were  
569 diluted to a final OD<sub>600</sub> of 0.1 using fresh growth medium. If a culture did not reach OD<sub>600</sub> of 0.1, the entire  
570 culture was used as the working stock for community assembly. Equal volumes of each stock were pooled  
571 to create a 104-member synthetic community. The community was centrifuged at 5000  $\times$  *g* for 5 min,  
572 washed, and resuspended in an equivalent volume of PBS to generate the pooled community working  
573 stock. SAAC medium (Dodd et al., 2017) was made containing all amino acids at 1 mM concentration  
574 except for cysteine, which was added at 4.126 mM (**Table S6**). Twenty similar media were made in which  
575 one amino acid at a time was removed. 1.6 mL of each medium was aliquoted in triplicate and inoculated  
576 with the pooled community at 1:10 or 1:100 dilution. Four 100  $\mu$ L aliquots of each culture were collected  
577 at 48 h and processed for metagenomic sequencing.

578

### 579 **Constructing *C. sporogenes* mutants**

580 *C. sporogenes* deletion mutants were constructed using a previously reported protocol (Guo et al.,  
581 2019); the strains and primers used for each mutant are listed in **Table S7**. In brief, from plasmids CS\_OTC  
582 and CS\_ADI—which harbor the targeting and repair templates—we amplified DNA sequences encoding  
583 the gRNA locus (the gRNA plus adjacent elements and the repair template) and ligated the amplicon into  
584 the pMTL82254 backbone. These repair templates consist of 700- to 1200-bp sequences flanking the 40-  
585 to 100-bp sequence targeted for excision.

586 To construct the  $\Delta$ *adi* strain, a gRNA fragment was purchased from Quintara and amplified with  
587 primers fwd\_pMTL82254\_NotI, rev\_gRNA\_flank1. The two flanking regions were amplified from *C.*  
588 *sporogenes* genomic DNA using the primers 5rev\_flank1 and 5fwd\_flank1\_flank2 for flank 1 and  
589 5rev\_flank1\_flank2 and 5fwd\_flank1\_flank2 for flank 2. Next, the flanking regions were joined by amplifying  
590 with primers fwd\_gRNA\_flank1 and rev\_flank2. The amplified gRNA fragment was attached to the joined  
591 flank construct by amplifying with primers fwd\_pMTL82254\_NotI and rev\_pMTL82254\_AscI. Finally, the

592 pMTL82254 plasmid and the construct containing the gRNA, flank1, and flank2 regions were digested with  
593 NotI and Ascl and ligated with T4 ligase (NEB). The final construct was named CS\_ADI.

594 To make the  $\Delta otc$  strain, the gRNA fragment was purchased from Quintara and amplified with  
595 fwd\_pMTL82254\_NotI and rev\_OTC\_gRNA\_flank1. The two flanking regions were amplified from *C.*  
596 *sporogenes* genomic DNA using the primers fwd\_OTC\_gRNA\_flank1 and rev\_OTC\_flank1\_flank2 for flank  
597 1 and fwd\_OTC\_flank1\_flank2 and rev\_OTC\_flank2 for flank 2. Next, the flanking regions were joined by  
598 amplifying with the primers fwd\_OTC\_gRNA\_flank1 and rev\_OTC\_flank2. The amplified gRNA fragment  
599 was attached to the joined flank construct by amplifying with fwd\_pMTL82254\_NotI and  
600 rev\_pMTL82254\_AscI. Finally, the pMTL82254 plasmid and the construct containing the gRNA, flank1,  
601 and flank2 regions were digested with NotI and Ascl and ligated with T4 ligase (NEB). The final construct  
602 was named CS\_OTC.

603 CS\_OTC or CS\_ADI was electroporated into *Escherichia coli* S17 cells and conjugated into *C.*  
604 *sporogenes* strain ATCC 15579 using a previously described method (Guo et al., 2019). In brief, a single  
605 colony of wild-type *C. sporogenes* was used to inoculate 2 mL of TYG broth (3% (w/v) tryptone, 2% (w/v)  
606 yeast extract, 0.1% (w/v) sodium thioglycolate) and incubated anaerobically in an atmosphere consisting  
607 of 10% CO<sub>2</sub>, 5% H<sub>2</sub>, and 85% N<sub>2</sub>. *E. coli* S17 cells with CS\_OTC or CS\_ADI were grown in LB broth  
608 supplemented with 250 µg/mL erythromycin at 30 °C with shaking at 225 rpm. After 17-24 h, 1 mL of this  
609 culture was centrifuged at 1000 x g for 1 min and washed twice with 500 µL of PBS (40 mM potassium  
610 phosphate, 10 mM magnesium sulfate, pH 7.2). The pellet was transferred into the anaerobic chamber  
611 and 250 µL of *C. sporogenes* overnight culture was added and mixed with the cell pellet. 30 µL aliquots of  
612 the mixture were plated on a pre-reduced TYG agar plate in eight spots. The plate was tilted to coalesce  
613 the spots and incubated for 24 h. Biomass from the plate was scraped using a sterile inoculation loop and  
614 suspended in 250 µL of pre-reduced PBS. 100 µL of the cell suspension was plated on TYG agar  
615 containing 10 µg/mL erythromycin and 250 µg/mL D-cycloserine to isolate single colonies. One colony was  
616 picked, sequence verified, and used as the starting point for the next conjugation.

617 In the second conjugation, *E. coli* S17 cells containing pMTL83153\_fdx\_Cas9 were grown in LB  
618 broth supplemented with 25 µg/mL chloramphenicol at 30 °C with shaking at 225 rpm. After washing, the  
619 pellet was moved into the anaerobic chamber and 250 µL of an overnight culture of *C. sporogenes*  
620 harboring the CS\_OTC vector was thoroughly mixed with the *E. coli* cell pellet. 30 µL aliquots of the mixture  
621 was plated on a pre-reduced TYG agar plate in eight spots. The plate was tilted to coalesce the spots and  
622 incubated for 72 h. Biomass from the plate was scraped using a sterile inoculation loop and resuspended  
623 in 250 µL of pre-reduced PBS. 100 µL of the cell suspension was plated on each of two pre-reduced TYG  
624 agar plates containing 10 µg/mL erythromycin, 15 µg/mL thiamphenicol, and 250 µg/mL D-cycloserine. *C.*  
625 *sporogenes* colonies typically appeared after 36-48 h, and 8-10 colonies were re-streaked on pre-reduced  
626 TYG agar plates containing 10 µg/mL erythromycin, 15 µg/mL thiamphenicol, and 250 µg/mL D-cycloserine

627 to isolate single colonies. The isolated colonies were used to inoculate pre-reduced TYG broth  
628 supplemented with 10 µg/mL erythromycin and 15 µg/mL thiamphenicol, and genomic DNA was isolated  
629 using a Quick DNA fungal/bacterial kit (Zymo Research). Primers ADI\_532\_fwd and ADI\_22\_rev or  
630 OTC\_5\_up\_fwd and OTC\_930\_down\_rev (**Table S2**) were used to verify deletions.

631

### 632 **ATP assay**

633 An aliquot from a frozen stock of *C. sporogenes* was used to inoculate 5 mL of TYG broth and  
634 grown to stationary phase (~24 h). Cells were diluted 1:1000 into 20 mL of TYG broth and grown to late-  
635 log phase (~16 h). Cells were harvested by centrifugation (5,000 x *g* for 10 min at 4 °C) and washed twice  
636 with 20 mL of pre-reduced PBS. 100 µL of cells was seeded into rows of a 96-well microtiter plate (12 wells  
637 per condition). 200 µL of pre-reduced 2 mM substrate (arginine) in phosphate washing buffer, or 200 µL of  
638 buffer alone, were dispensed into rows of a separate 96-well microplate. At *t*=0, 100 µL of substrate or  
639 buffer were added to the cells and mixed gently by pipetting. At *t*=-5 min, -1 min, 30 s, 1 min, 2 min, 5 min,  
640 10 min, 20 min, 30 min, 45 min, 60 min, and 90 min, 10 µL of cells were extracted and mixed with 90 µL  
641 of DMSO to quench the reaction and liberate cellular ATP. For the time points *t*=-5 min and -1 min—prior  
642 to the addition of buffer or substrate—5 µL of cell suspension was harvested and 5 µL of either buffer or  
643 substrate were added to the cell-DMSO mixture to bring the total volume to 100 µL. The ATP content from  
644 10 µL aliquots of lysed cells was measured using a luminescence-based ATP determination kit (Invitrogen,  
645 Cat. #A22066). Absolute ATP levels were calculated using a calibration curve with known concentrations  
646 of ATP.

647

### 648 **Strain dropout experiments**

649 Strains were passaged by diluting 1:10 into fresh growth medium every 24 h for 2-3 days. The day  
650 before strain dropout experiments, cultures were diluted 1:10 into 1 mL of medium and grown overnight as  
651 inoculation working stocks. To measure OD<sub>600</sub>, strains were diluted 1:10 into 150 µL of the appropriate  
652 culture medium and a plate reader was used to measure absorbance at 600 nm. Stocks were normalized  
653 using fresh growth medium to a final OD<sub>600</sub> of 0.1. If an overnight culture did not reach OD<sub>600</sub> of 0.1, the  
654 entire culture was used as the working stock for community assembly. For community assembly, 10 mL of  
655 each stock were pipetted into a 12-well reservoir plate.

656 Strain dropouts were performed on a row-by-row basis in a 96-well deep-well plate. For example,  
657 to individually dropout each of the 12 strains in row A, equal volumes of all community members not in row  
658 A were pooled and aliquoted into 12 sterile 1.5 mL Eppendorf tubes. This process resulted in 120 µL of  
659 each of 104-12=92 strains for each of 12 communities being combined into a 11.04 mL pool, which was  
660 divided into 12 aliquots of 920 µL in sterile Eppendorf tubes. To add the strains in row A, 12 sub-  
661 communities were created by pooling 10 µL of each of the 12 strains except for the intended dropout. 10

662  $\mu\text{L}$  of PBS were added, for a total volume of 120  $\mu\text{L}$ , which was added to the 920  $\mu\text{L}$  pooled community  
663 lacking row A, resulting in the creation of 12 communities with volume 1040  $\mu\text{L}$ , each lacking one of the  
664 104 strains. This process was repeated for all rows to cover the 104 strains over 2 days; 24 and 80 dropouts  
665 were constructed on day 1 and 2, respectively. Each dropout community was washed once via  
666 centrifugation at 5000 x  $g$  for 5 min and resuspended in an equal volume of sterile PBS. Sixteen microliters  
667 of each dropout community were used to inoculate 1.6 mL of SAAC medium. Four hundred microliter  
668 aliquots were collected at 12 h, 24 h, and 48 h post-inoculation. The initial dropout community stocks and  
669 all aliquots were processed for metagenomic sequencing using a Power Soil DNA extraction kit (Qiagen).  
670

### 671 **Pairwise co-culture growth measurements**

672 Each strain was inoculated from a frozen stock into its optimal growth medium (Mega Medium or  
673 Chopped Meat Medium) and the culture was incubated for 24 h at 37 °C.  $\text{OD}_{600}$  was measured, and 1 mL  
674 of each strain was washed with sterile 1x PBS. 0.75  $\mu\text{L}$  of each strain (for co-cultures) or PBS (for  
675 monocultures) was added to 148.5  $\mu\text{L}$  SAAC medium for a total volume of 150  $\mu\text{L}$ . The baseline  $\text{OD}_{600}$  and  
676 growth curves were measured using an Epoch plate reader (Biotek). For *C. sporogenes* and *L. lactis*,  
677 cultures were normalized to  $\text{OD}_{600}=1.0$  before mixing. All cultures were performed in technical triplicate  
678 with 2-6 biological replicates. For each growth curve, the interaction score  $\alpha$  was computed based on an  
679 additive null model (Aranda-Díaz et al., 2020):

$$680 \quad \alpha = \frac{\text{OD}_{\text{co}} - (\text{OD}_{\text{s1}} + \text{OD}_{\text{s2}})}{\sqrt{\text{OD}_{\text{s1}} \text{OD}_{\text{s2}}}},$$

681 where  $\text{OD}_{\text{co}}$ ,  $\text{OD}_{\text{s1}}$ , and  $\text{OD}_{\text{s2}}$  are the maximum OD values of the co-culture and the individual strains s1  
682 and s2, respectively. The time to reach half maximum absorbance ( $t_{1/2}$ ) was measured for individual  
683 cultures and co-cultures and labeled as significant if average co-culture  $t_{1/2}$  was greater than either  
684 individual average  $t_{1/2}$ . Student's t-test was utilized to determine significant changes with  $p < 0.05$ .

### 685 686 **Mis-mapping estimation using monoculture sequencing**

687 Read fractions were analyzed using custom Matlab (Mathworks, R2018a) code. Read fractions  
688 were rescaled to sum to 1, thereby reflecting the relative abundances of reads mapped to one of the 104  
689 genomes in our database. These data were used to calculate expected relative abundances of each strain  
690 from mis-mapping data as described below. The expected mis-mapped relative abundance ( $E_{i,j}$ ) for strain  
691  $i$  in a sample  $j$  was calculated as

$$692 \quad E_{i,j} = \sum_{i \neq k} R_{k,j} \times r_{i,k}$$

693 where  $R_{k,j}$  is the relative abundance of strain  $k$  in sample  $j$  and  $r_{i,k}$  is the relative abundance of strain  $i$  in  
694 sequencing data of strain  $k$  as an isolate. Strains whose relative abundance was comparable to the  
695 expected mis-mapped relative abundance ( $E_{i,j} < 10r_{i,j}$ ) were removed from further analysis.

696

### 697 **Amino acid dropout data analysis**

698 Read fractions were rescaled to sum to 1, thereby reflecting the relative abundances of reads  
699 mapped to one of the 104 genomes in our database. The effect of removal of an amino acid on a strain  
700 was estimated by calculating the z score  $z_{k,j} = \frac{R_{k,j} - \mu_k}{\sigma_k}$ , where  $R_{k,j}$  is the  $\log_{10}$ (relative abundance) of strain  
701  $k$  in sample  $j$  and  $\mu_k$  and  $\sigma_k$  are the mean and standard deviation, respectively, of  $\log_{10}$ (relative abundance)  
702 for strain  $k$  across all samples except the cysteine dropout. The cysteine dropout sample was excluded  
703 from the calculation of  $\mu_k$  and  $\sigma_k$  because this sample was an obvious outlier. Data points that could be  
704 explained by mismapping were removed. Putative interactions were identified based on  $|z_{j,k}| > 2$ , i.e. amino  
705 acid dropouts that changed the  $\log_{10}$ (relative abundance) of strain  $k$  by  $\geq 2$  standard deviations relative to  
706 its mean. Some strains varied in relative abundance by several orders of magnitude; as a result,  $\sigma_k$  was  
707 large, so putative interactions would be missed using z-scores.

708 To identify clusters of strains that responded similarly or amino acids that elicited a similar  
709 response, we normalized  $R_{k,j}$  for each strain across samples by subtracting  $\mu_k$  and performed hierarchical  
710 clustering of both strains and amino acid dropouts on a dataset including strains that were detected in all  
711 21 amino acid dropout samples.

712

### 713 **Strain interactions in strain-dropout data**

714 Read fractions were rescaled to sum to 1, reflecting the relative abundances of reads mapped to  
715 one of the 104 genomes in our database. Samples with  $< 10^6$  reads, as well as the *Eubacterium siraeum*  
716 DSM 15702 dropout (which appeared to be missing an additional strain, *A. caccae*), were discarded from  
717 further analysis.

718 To identify batch effects that caused unintentional groupings within the dataset, we subtracted the  
719 mean  $\log_{10}$ (relative abundance) of each strain in  $t=48$  h samples from the  $\log_{10}$ (relative abundance) in each  
720 sample. These normalized relative abundances were used to calculate the Pearson correlation coefficient  
721 of each pair of samples. Based on this correlation matrix, samples were split into 4 experimental groups  
722 that corresponded to natural groupings arising from the experimental setup (**Figure S6**), with group sizes  
723  $n=21, 57, 12$  and  $8$ . For the two largest groups, z-scores were calculated for each strain based on the  
724 mean and standard deviation of  $\log_{10}$ (relative abundances) within the corresponding experimental group.  
725 To account for noise in low-abundance strains, z-scores were only calculated for strains that were  
726 undetected in  $< 5$  samples in the experimental group. Data points that could be explained by mismapping  
727 were removed. Statistics were calculated using only detected strains in each sample; undetected strains

728 were only set to an arbitrary small number for graphical representation. Putative interactions were defined  
729 based on  $|z_{i,k}| > 2$ .

730

### 731 **Statistical analysis**

732 The statistical details of experiments can be found in the figure legends. Reported  $n$  values are the  
733 total samples (cultures) per group. Unless otherwise stated,  $p$ -values were not corrected for multiple  
734 hypothesis testing. Benjamini-Hochberg corrections, hypergeometric tests, Student's  $t$ -tests (unpaired or  
735 two-tailed), and Kruskal-Wallis tests were performed in MATLAB.

736

### 737 **ACKNOWLEDGMENTS**

738 We are deeply indebted to members of the Fischbach and Huang labs for helpful discussions, and to Rod  
739 Mackie (UIUC) for bacterial strains used in this study. A.A.-D. is a Howard Hughes Medical Institute  
740 International Student Research fellow, a Stanford Bio-X Bowes fellow, and a Siebel Scholar. This work  
741 was supported by the Stanford Microbiome Therapies Initiative (M.A.F., K.C.H.), NIH grants RM1  
742 GM135102 (K.C.H.), DP1 DK113598 (M.A.F.), P01 HL147823 (M.A.F.), and R01 DK101674 (M.A.F.), the  
743 Bill and Melinda Gates Foundation (M.A.F.), an HHMI-Simons Faculty Scholars Award (M.A.F.), the  
744 Leducq Foundation (M.A.F.), the Stanford-Coulter Translational Research Grants Program (M.A.F.), the  
745 Chan Zuckerberg Biohub (K.C.H., M.A.F.), and the Allen Discovery Center at Stanford on Systems  
746 Modeling of Infection (K.C.H.).

747

### 748 **AUTHOR CONTRIBUTIONS**

749 Conceptualization: A.C., M.A.F. Methodology and investigation: A.C., A.A.-D., S.J., F.Y., M.I., X.M., A.P.,  
750 A.W., A.L.S., A.D., K.C.H., M.A.F. Formal analysis: A.C., A.A.-D., S.J., F.Y., M.I., X.M., K.C.H., M.A.F.  
751 Visualization: A.C., A.A.-D., S.J., K.C.H., M.A.F. Supervision: K.C.H., M.A.F. Writing: A.C., A.A.-D., S.J.,  
752 F.Y., K.C.H., M.A.F. All authors reviewed the manuscript before submission.

753

### 754 **DECLARATION OF INTERESTS**

755 Stanford University and the Chan Zuckerberg Biohub have patents pending for microbiome technologies  
756 on which the authors are co-inventors. M.A.F. is a co-founder and director of Federation Bio and Viralogic,  
757 a co-founder of Revolution Medicines, and a member of the scientific advisory boards of NGM Bio and  
758 Zymergen. A.G.C. has been a paid consultant to Federation Bio. All of the other authors have no competing  
759 interests.

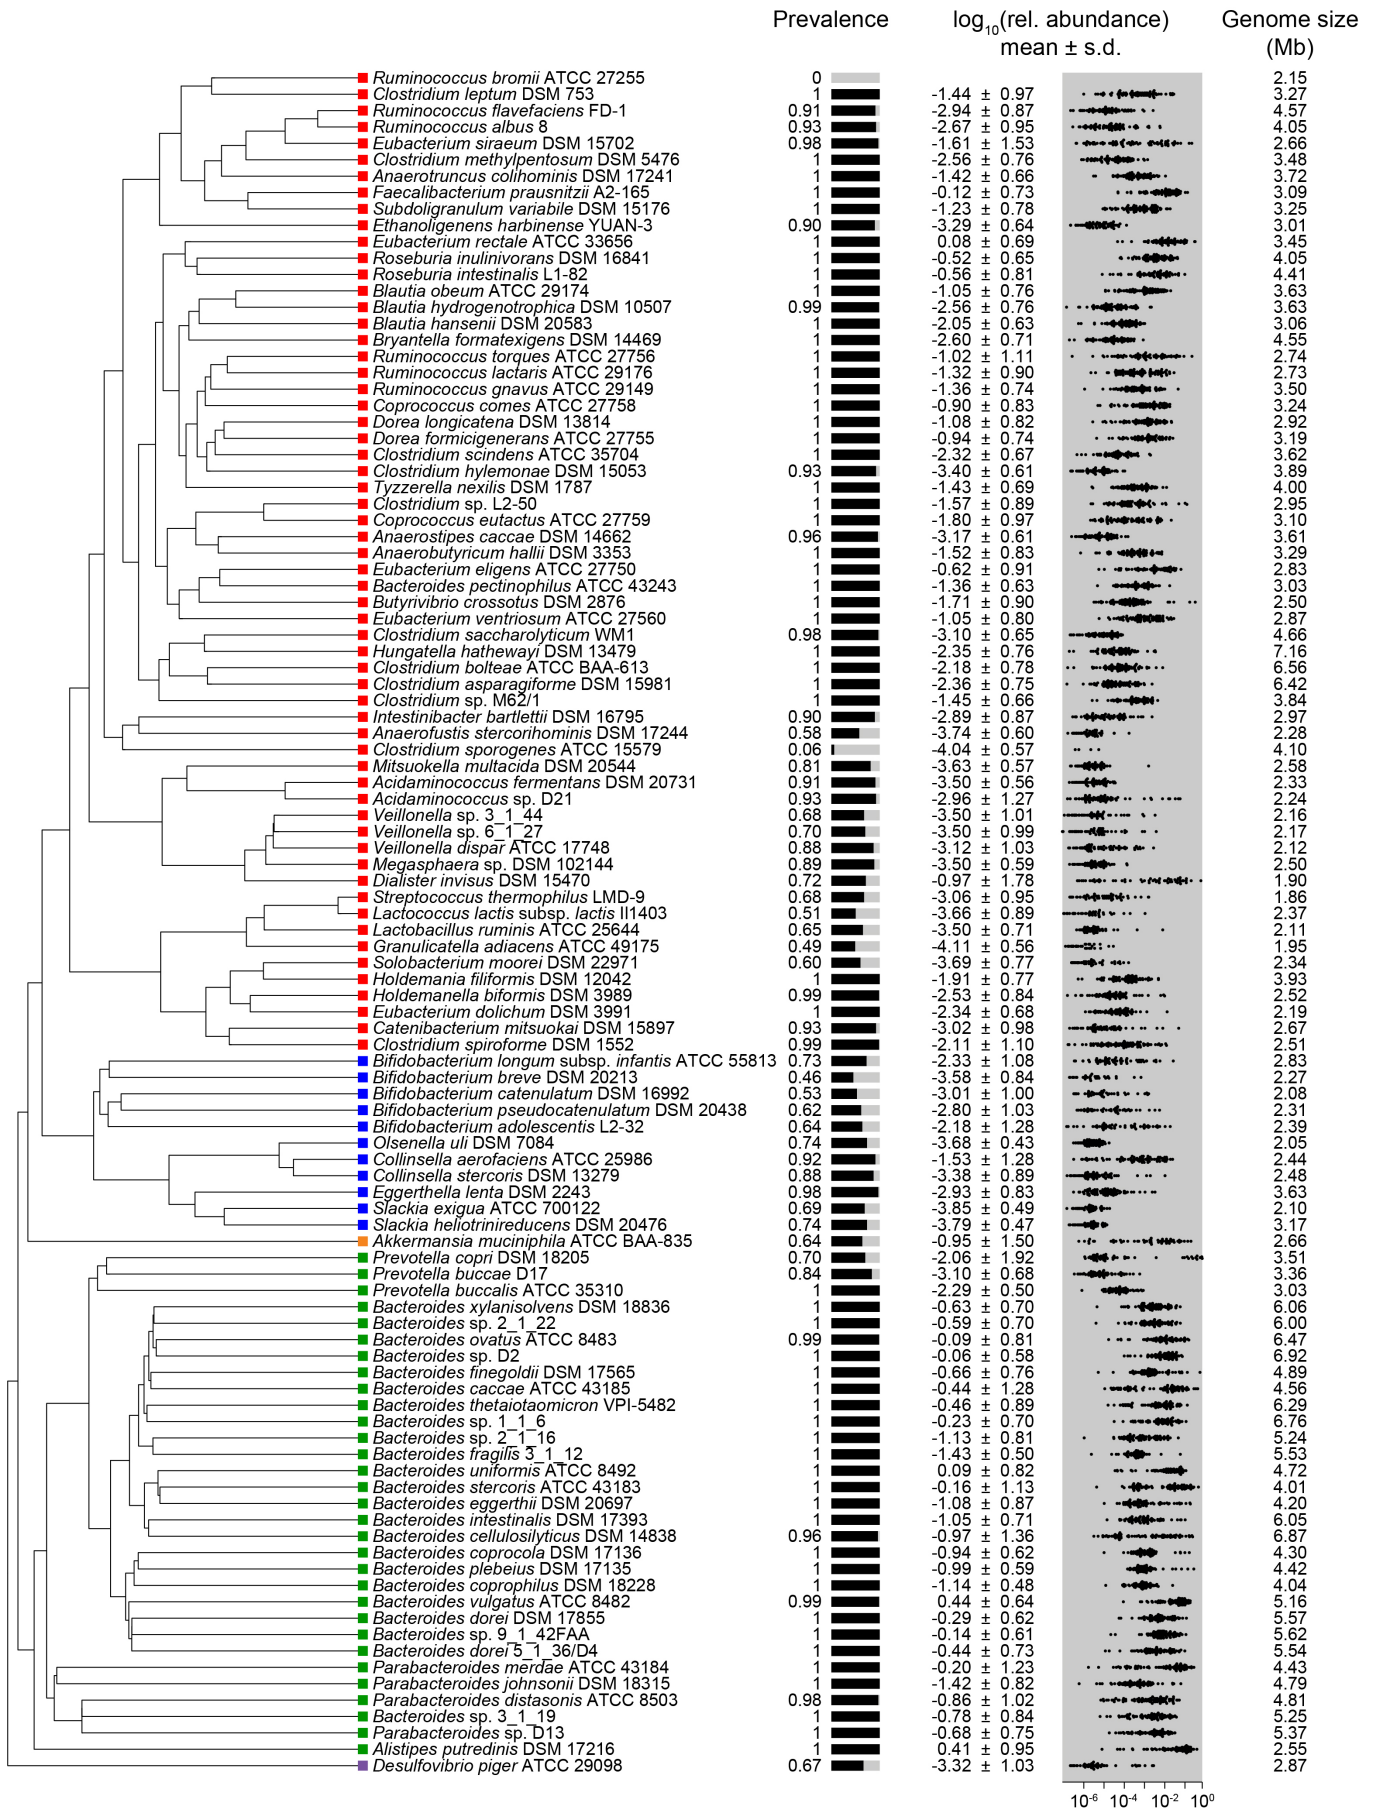



760 **Figure 1: A complex gut bacterial community.** A phylogenetic tree of the 104 strains in the community  
761 based on a multiple sequence alignment of conserved single-copy genes. The community was designed  
762 by identifying the most prevalent strains in sequencing data from the NIH Human Microbiome Project  
763 (HMP). Colors indicate the phylum of each strain: Firmicutes = red, Actinobacteria = blue, Verrucomicrobia  
764 = orange, Bacteroidetes = green, and Proteobacteria = purple. Also shown are the prevalence and relative  
765 abundance of each strain in the data set from the NIH HMP ( $n=81$  subjects), and the size of each strain's  
766 genome.

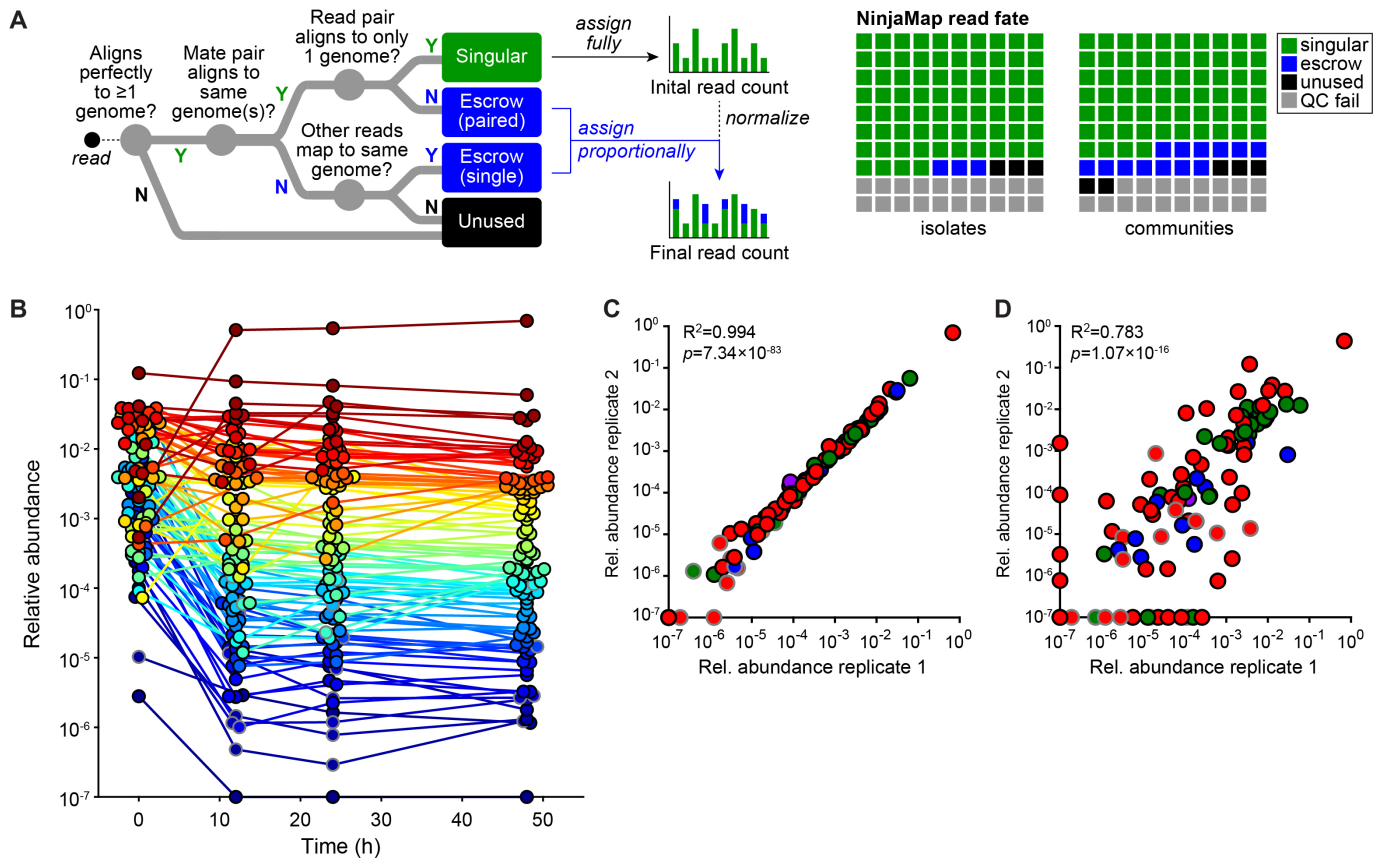

767 **Figure 2: A sensitive and specific read mapping pipeline.** (A) A schematic of NinjaMap, a new  
 768 algorithm that quantifies strain abundances in defined communities with high accuracy. Reads that match  
 769 a single genome unambiguously are assigned to that genome; reads that match multiple genomes are  
 770 placed in escrow. An initial estimate of the relative abundance of each strain is computed from the  
 771 unambiguous alignments and used to assign escrow reads proportionally. The final read counts are then  
 772 normalized to obtain relative abundances. (B) The community reaches a stable configuration quickly. Each  
 773 dot is an individual strain; the collection of dots in a column represents the community at a single timepoint.  
 774 Strains are colored according to their rank-order abundance in the community at 48 h. By 12 h, The relative  
 775 abundances of strains in the community span six orders of magnitude and remain largely stable through  
 776 48 h. (C) Communities generated from the same inoculum (i.e., technical replicates) have a nearly identical  
 777 composition at 48 h. (D) Communities generated from two inocula prepared on different days (i.e.,  
 778 biological replicates) have a similar architecture at 48 h. In (C) and (D), the color of each circle represents  
 779 the phylum of the corresponding species, and circles with gray outlines represent strains whose presence  
 780 could be explained by read mis-mapping.

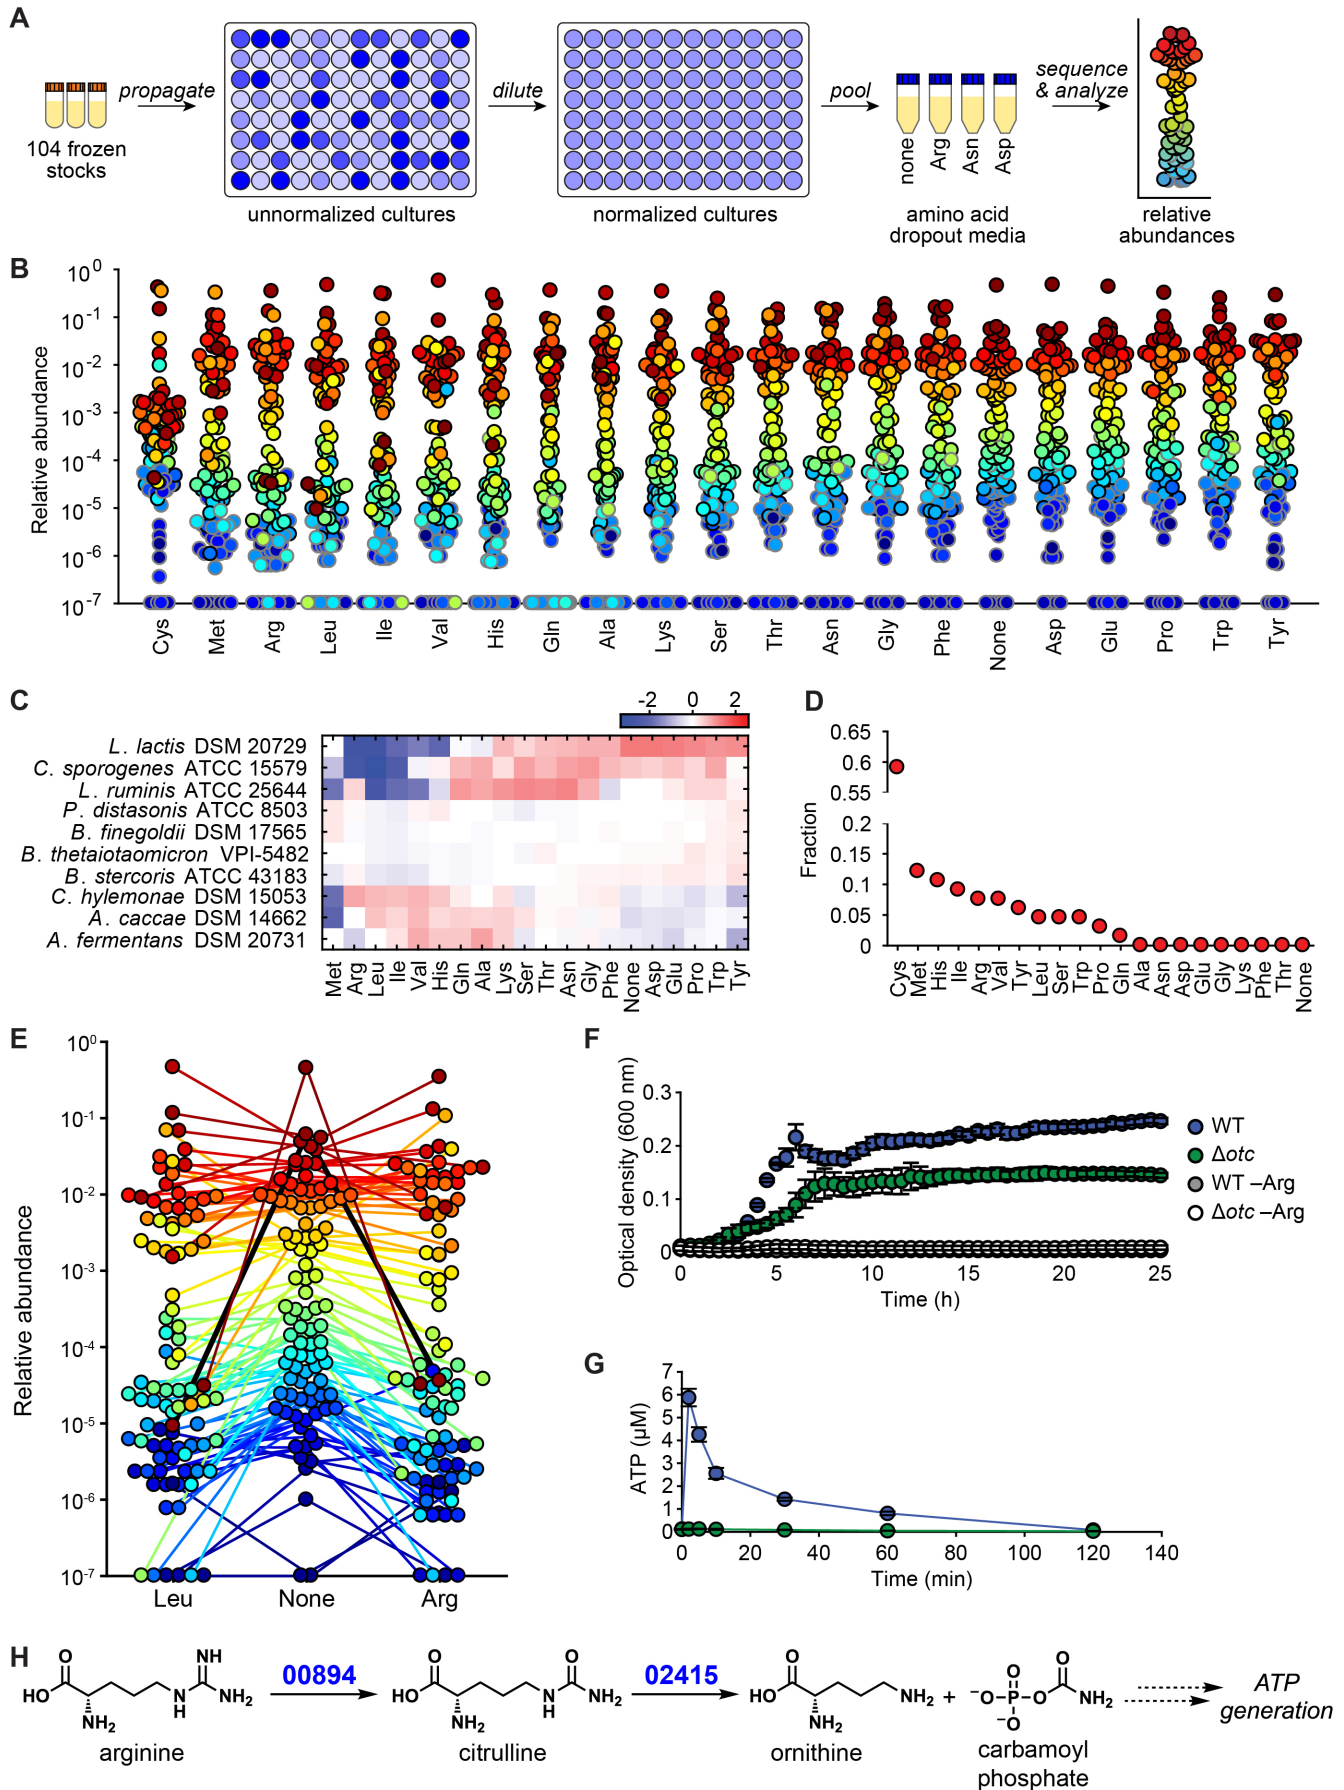

781 **Figure 3: Systematic analysis of strain-amino acid interactions.** (A) Schematic of the amino acid  
782 dropout experiment. Frozen stocks of the 104 strains were used to inoculate cultures that were grown for  
783 24 h, diluted to similar optical densities (to the extent possible), and pooled. The mixed culture was used  
784 to inoculate one of twenty defined media lacking one amino acid at a time. After 48 h, communities were  
785 sequenced and analyzed by NinjaMap to determine changes relative to growth in the complete defined  
786 medium. (B) Community composition is impacted by amino acid dropout. Each dot is an individual strain;  
787 the collection of dots in a column represents the community at a single timepoint. Strains are colored  
788 according to their rank-order abundance in the community grown in complete defined medium. Strains  
789 whose relative abundance could be explained by read mis-mapping from a more abundant strain in the  
790 same sample are plotted with a gray outline. Undetected strains were set to  $10^{-7}$  for visualization. (C) A  
791 heat map showing the  $\log_{10}$ (relative abundance) normalized to strain mean for a subset of strains (full set  
792 is shown **Figure S3A**). The Firmicutes *L. lactis*, *C. sporogenes*, and *L. ruminis* grow less robustly in the  
793 absence of Leu and Ile. (D) The effect of amino acid removal varies widely across amino acids. A z-score  
794 was calculated based on the standard deviation of strain abundance across all samples except the cysteine  
795 dropout. The fraction of strains with  $|z|>2$  is shown for each amino acid dropout ( $n=66$ ). (E) The absence  
796 of leucine or arginine leads to a large decrease in *C. sporogenes* relative abundance. Strains are colored  
797 according to their rank-order abundance in the community grown in complete defined medium. Only strains  
798 that were detected in at least one of the three samples were included ( $n=92$ ). *C. sporogenes* is highlighted  
799 in black. Undetected strains were set to  $10^{-7}$  for visualization. (F) *C. sporogenes* growth in complete defined  
800 medium is dependent on the presence of arginine, and ornithine transcarbamoylase (*otc*) is partially  
801 responsible for Arg metabolism. Wild type *C. sporogenes* and a  $\Delta otc$  mutant were grown in complete  
802 defined medium +/- Arg. Growth curves depict the mean of 3 replicates. Error bars represent 1 standard  
803 deviation. (G) *C. sporogenes* requires *otc* to produce ATP from arginine. Intracellular ATP levels in *C.*  
804 *sporogenes* incubated in PBS containing 2 mM Arg are shown. (H) A proposed pathway for Arg metabolism  
805 in *C. sporogenes*. Based on these data, we propose that Arg is converted to citrulline by the putative Arg  
806 deiminase CLOSPO\_00894; citrulline is then hydrolyzed to ornithine and carbamoyl phosphate by the  
807 putative ornithine transcarbamoylase CLOSPO\_02415, leading to the production of ATP.

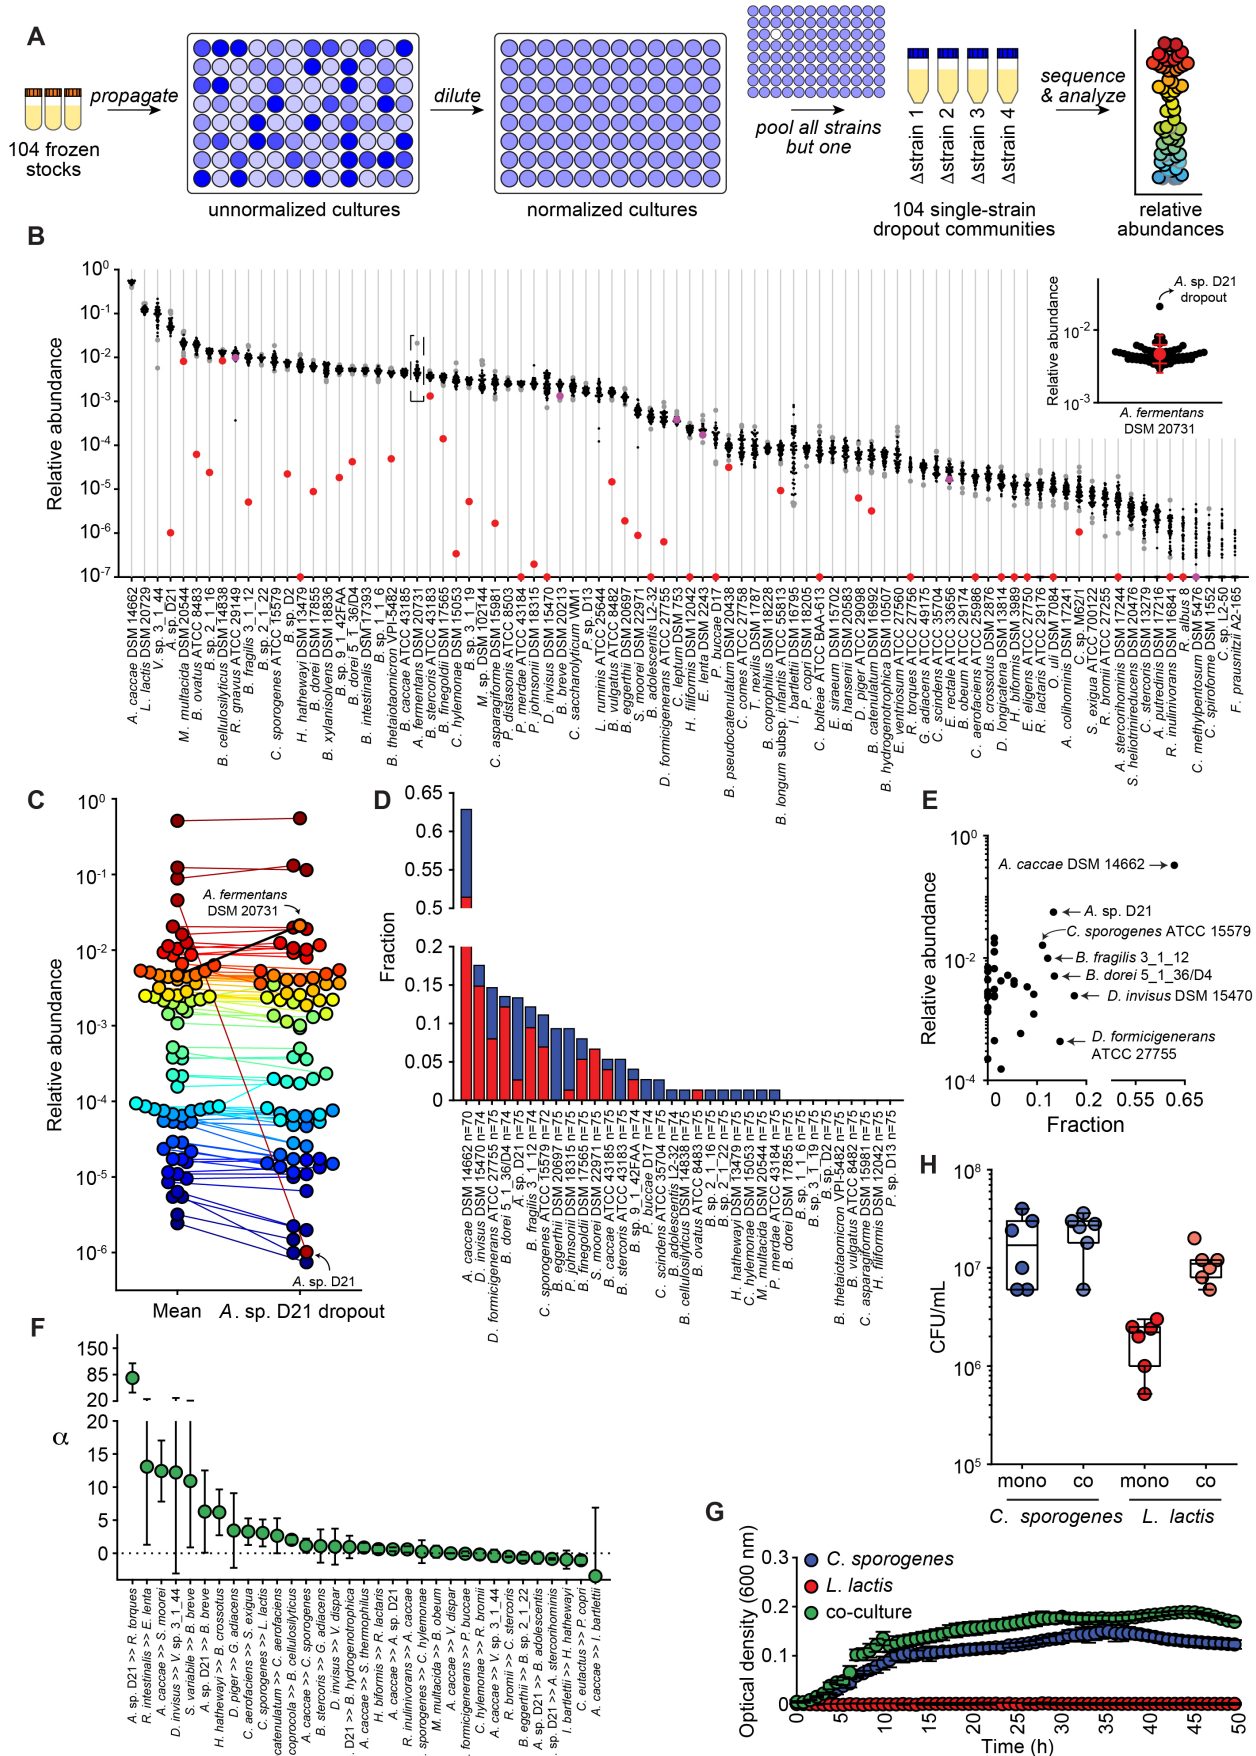

808 **Figure 4: Systematic analysis of strain-strain interactions.** (A) Schematic of the strain dropout  
809 experiment. Frozen stocks of the strains were used to inoculate cultures that were grown for 24 h, diluted  
810 to similar optical densities (to the extent possible), and combined into 104 communities, each of which is  
811 missing a single strain (i.e., 103-member communities). After 48 h, communities were sequenced and  
812 analyzed by NinjaMap to determine changes relative to the growth of the full 104-member community. (B)  
813 Relative abundances for most strains are narrowly distributed. Each column depicts the relative abundance  
814 of an individual strain across a set of 57 strain dropouts (black dots); the relative abundance of each strain  
815 in its own dropout is shown as a red dot. Relative abundances in samples with  $|z|>2$  are shown as gray  
816 dots. Undetected strains were set to  $10^{-7}$  for visualization. Inset: an enlarged view of the relative abundance  
817 of *Acidaminococcus fermentans* DSM 20731 across 57 strain dropouts, showing that the elimination of  
818 *Acidaminococcus* sp. D21 led to the expansion of *A. fermentans* DSM 20731. The red circle is the mean  
819  $\log_{10}$ (relative abundance); error bars show one (wide bar) or two (narrow bar) standard deviations from the  
820 mean. (C) Response of the community to the removal of a single strain. Each dot is an individual strain;  
821 the collection of dots in a column represents the community at a single timepoint. 76 strains are shown;  
822 they are colored according to their rank-order mean  $\log_{10}$ (relative abundance) across all samples in the  
823 experimental group ( $n=57$ ). Both *Acidaminococcus* strains in the community are labeled; the removal of  
824 *Acidaminococcus* sp. D21 leads to an increase in *A. fermentans* DSM 20731, with most other strains  
825 staying at a similar level. (D) Removal of certain strains affected a large proportion of the community. The  
826 effect of a strain dropout on each strain was determined by calculating the z-score across all samples  
827 within an experimental group (Methods). The fraction of putative interactions was calculated based on the  
828 strains with  $|z|>2$  for each strain dropout ( $z<-2$  in blue,  $z>2$  in red). Only strains above the limit of detection  
829 in the experimental group were counted, thus  $n$  is variable. (E) Some strains whose removal affected a  
830 large portion of the community were at high relative abundance, others low. The plot shows the mean  
831  $\log_{10}$ (relative abundance) for each strain in the largest experimental group ( $n=57$ ), excluding the sample in  
832 which that strain was dropped out. (F) A subset of the predicted interactions in the 104-member community  
833 can be recapitulated in binary culture. Interaction scores were high for some strain pairs ( $a \rightarrow b$ , where  
834 removal of strain  $a$  affected strain  $b$ ) with  $z<-2.6$  (predicted positive interaction). We also included a pair  
835 with slightly smaller z-score ( $z=-2.1$ , *C. sporogenes*  $\rightarrow$  *L. lactis*). Data are the mean of 2-6 replicates, and  
836 error bars represent 1 standard deviation from the mean. (G) *C. sporogenes* promotes *L. lactis* growth in  
837 binary culture. Growth curves are plotted for mono- or co-cultures of *C. sporogenes* and *L. lactis* in  
838 complete defined medium. Data are means and error bars represent 1 standard deviation from the mean  
839 ( $n=3$ ). (H) Colony forming units for both strains in mono- or co-culture in complete defined medium. *C.*  
840 *sporogenes* levels were unaffected but the density of *L. lactis* increased ~10-fold in co-culture ( $p$ -values  
841 correspond to Student's t-tests ( $n=6$ ). \*\*:  $p<0.05$ ).

842 **REFERENCES**

- 843 Abreu, C.I., Friedman, J., Andersen Woltz, V.L., and Gore, J. (2019). Mortality causes universal changes  
844 in microbial community composition. *Nat. Commun.* 10, 2120.
- 845
- 846 Angly, F.E., Willner, D., Rohwer, F., Hugenholtz, P., and Tyson, G.W. (2012). Grinder: a versatile  
847 amplicon and shotgun sequence simulator. *Nucleic Acids Res.* 40, e94.
- 848
- 849 Aranda-Díaz, A., Ng, K.M., Thomsen, T., Real-Ramírez, I., Dahan, D., Dittmar, S., Gonzalez, C.G.,  
850 Chavez, T., Vasquez, K.S., Nguyen, T.H., et al. (2020). High-throughput cultivation of stable, diverse,  
851 fecal-derived microbial communities to model the intestinal microbiota. *BioRxiv*.
- 852
- 853 Bai, Y., Müller, D.B., Srinivas, G., Garrido-Oter, R., Potthoff, E., Rott, M., Dombrowski, N., Münch, P.C.,  
854 Spaepen, S., Remus-Emsermann, M., et al. (2015). Functional overlap of the Arabidopsis leaf and root  
855 microbiota. *Nature* 528, 364–369.
- 856
- 857 Bairey, E., Kelsic, E.D., and Kishony, R. (2016). High-order species interactions shape ecosystem  
858 diversity. *Nat. Commun.* 7, 12285.
- 859
- 860 Bankevich, A., Nurk, S., Antipov, D., Gurevich, A.A., Dvorkin, M., Kulikov, A.S., Lesin, V.M., Nikolenko,  
861 S.I., Pham, S., Prjibelski, A.D., et al. (2012). SPAdes: a new genome assembly algorithm and its  
862 applications to single-cell sequencing. *J. Comput. Biol.* 19, 455–477.
- 863
- 864 Blasche, S., Kim, Y., Oliveira, A.P., and Patil, K.R. (2017). Model microbial communities for ecosystems  
865 biology. *Current Opinion in Systems Biology* 6, 51–57.
- 866
- 867 Buffie, C.G., Bucci, V., Stein, R.R., McKenney, P.T., Ling, L., Gobourne, A., No, D., Liu, H., Kinnebrew,  
868 M., Viale, A., et al. (2015). Precision microbiome reconstitution restores bile acid mediated resistance to  
869 *Clostridium difficile*. *Nature* 517, 205–208.
- 870
- 871 Carlström, C.I., Field, C.M., Bortfeld-Miller, M., Müller, B., Sunagawa, S., and Vorholt, J.A. (2019).  
872 Synthetic microbiota reveal priority effects and keystone strains in the Arabidopsis phyllosphere. *Nat.*  
873 *Ecol. Evol.* 3, 1445–1454.
- 874
- 875 Chaumeil, P.-A., Mussig, A.J., Hugenholtz, P., and Parks, D.H. (2019). GTDB-Tk: a toolkit to classify  
876 genomes with the Genome Taxonomy Database. *Bioinformatics*.
- 877
- 878 Cullen, T.W., Schofield, W.B., Barry, N.A., Putnam, E.E., Rundell, E.A., Trent, M.S., Degnan, P.H.,  
879 Booth, C.J., Yu, H., and Goodman, A.L. (2015). Antimicrobial peptide resistance mediates resilience of  
880 prominent gut commensals during inflammation. *Science* 347, 170–175.
- 881
- 882 Cunin, R., Glansdorff, N., Piérard, A., and Stalon, V. (1986). Biosynthesis and metabolism of arginine in  
883 bacteria. *Microbiol Rev* 50, 314–352.
- 884
- 885 Cuskin, F., Lowe, E.C., Temple, M.J., Zhu, Y., Cameron, E., Pudlo, N.A., Porter, N.T., Urs, K.,  
886 Thompson, A.J., Cartmell, A., et al. (2015). Human gut Bacteroidetes can utilize yeast mannan through a  
887 selfish mechanism. *Nature* 517, 165–169.
- 888
- 889 Deschasaux, M., Bouter, K.E., Prodan, A., Levin, E., Groen, A.K., Herrema, H., Tremaroli, V., Bakker,  
890 G.J., Attaye, I., Pinto-Sietsma, S.-J., et al. (2018). Depicting the composition of gut microbiota in a  
891 population with varied ethnic origins but shared geography. *Nat. Med.* 24, 1526–1531.
- 892
- 893 Dethlefsen, L., and Relman, D.A. (2011). Incomplete recovery and individualized responses of the  
894 human distal gut microbiota to repeated antibiotic perturbation. *Proc. Natl. Acad. Sci. USA* 108 *Suppl* 1,

895 4554–4561.

896

897 Dodd, D., Spitzer, M.H., Van Treuren, W., Merrill, B.D., Hryckowian, A.J., Higginbottom, S.K., Le, A.,  
898 Cowan, T.M., Nolan, G.P., Fischbach, M.A., et al. (2017). A gut bacterial pathway metabolizes aromatic  
899 amino acids into nine circulating metabolites. *Nature* 551, 648–652.

900

901 Faith, J.J., McNulty, N.P., Rey, F.E., and Gordon, J.I. (2011). Predicting a human gut microbiota's  
902 response to diet in gnotobiotic mice. *Science* 333, 101–104.

903

904 Faith, J.J., Guruge, J.L., Charbonneau, M., Subramanian, S., Seedorf, H., Goodman, A.L., Clemente,  
905 J.C., Knight, R., Heath, A.C., Leibel, R.L., et al. (2013). The long-term stability of the human gut  
906 microbiota. *Science* 341, 1237439.

907

908 Franzosa, E.A., Huang, K., Meadow, J.F., Gevers, D., Lemon, K.P., Bohannan, B.J.M., and  
909 Huttenhower, C. (2015). Identifying personal microbiomes using metagenomic codes. *Proc. Natl. Acad.*  
910 *Sci. USA* 112, E2930-8.

911

912 Friedman, J., Higgins, L.M., and Gore, J. (2017). Community structure follows simple assembly rules in  
913 microbial microcosms. *Nat. Ecol. Evol.* 1, 109.

914

915 Funabashi, M., Grove, T.L., Wang, M., Varma, Y., McFadden, M.E., Brown, L.C., Guo, C., Higginbottom,  
916 S., Almo, S.C., and Fischbach, M.A. (2020). A metabolic pathway for bile acid dehydroxylation by the gut  
917 microbiome. *Nature* 582, 566–570.

918

919 Goldford, J.E., Lu, N., Bajić, D., Estrela, S., Tikhonov, M., Sanchez-Gorostiaga, A., Segrè, D., Mehta, P.,  
920 and Sanchez, A. (2018). Emergent simplicity in microbial community assembly. *Science* 361, 469–474.

921

922 Goodman, A.L., McNulty, N.P., Zhao, Y., Leip, D., Mitra, R.D., Lozupone, C.A., Knight, R., and Gordon,  
923 J.I. (2009). Identifying genetic determinants needed to establish a human gut symbiont in its habitat. *Cell*  
924 *Host Microbe* 6, 279–289.

925

926 Goodman, A.L., Kallstrom, G., Faith, J.J., Reyes, A., Moore, A., Dantas, G., and Gordon, J.I. (2011).  
927 Extensive personal human gut microbiota culture collections characterized and manipulated in  
928 gnotobiotic mice. *Proc. Natl. Acad. Sci. USA* 108, 6252–6257.

929

930 Gopalakrishnan, V., Spencer, C.N., Nezi, L., Reuben, A., Andrews, M.C., Karpinets, T.V., Prieto, P.A.,  
931 Vicente, D., Hoffman, K., Wei, S.C., et al. (2018). Gut microbiome modulates response to anti-PD-1  
932 immunotherapy in melanoma patients. *Science* 359, 97–103.

933

934 Guo, C.-J., Allen, B.M., Hiam, K.J., Dodd, D., Van Treuren, W., Higginbottom, S., Nagashima, K.,  
935 Fischer, C.R., Sonnenburg, J.L., Spitzer, M.H., et al. (2019). Depletion of microbiome-derived molecules  
936 in the host using *Clostridium* genetics. *Science* 366.

937

938 Gurevich, A., Saveliev, V., Vyahhi, N., and Tesler, G. (2013). QUAST: quality assessment tool for  
939 genome assemblies. *Bioinformatics* 29, 1072–1075.

940

941 Gutiérrez, N., and Garrido, D. (2019). Species Deletions from Microbiome Consortia Reveal Key  
942 Metabolic Interactions between Gut Microbes. *MSystems* 4.

943

944 Hart, S.F.M., Pineda, J.M.B., Chen, C.-C., Green, R., and Shou, W. (2019). Disentangling strictly self-  
945 serving mutations from win-win mutations in a mutualistic microbial community. *Elife* 8.

946

947 He, Y., Wu, W., Zheng, H.-M., Li, P., McDonald, D., Sheng, H.-F., Chen, M.-X., Chen, Z.-H., Ji, G.-Y.,



- 948 Zheng, Z.-D.-X., et al. (2018). Regional variation limits applications of healthy gut microbiome reference  
949 ranges and disease models. *Nat. Med.* *24*, 1532–1535.
- 950
- 951 Hoek, T.A., Axelrod, K., Biancalani, T., Yurtsev, E.A., Liu, J., and Gore, J. (2016). Resource Availability  
952 Modulates the Cooperative and Competitive Nature of a Microbial Cross-Feeding Mutualism. *PLoS Biol.*  
953 *14*, e1002540.
- 954
- 955 Hsu, R.H., Clark, R.L., Tan, J.W., Romero, P.A., and Venturelli, O.S. (2019). Rapid microbial interaction  
956 network inference in microfluidic droplets: Supplementary Information. *BioRxiv*.
- 957
- 958 Kong, W., Meldgin, D.R., Collins, J.J., and Lu, T. (2018). Designing microbial consortia with defined  
959 social interactions. *Nat. Chem. Biol.* *14*, 821–829.
- 960
- 961 Kraal, L., Abubucker, S., Kota, K., Fischbach, M.A., and Mitreva, M. (2014). The prevalence of species  
962 and strains in the human microbiome: a resource for experimental efforts. *PLoS One* *9*, e97279.
- 963
- 964 Langmead, B., and Salzberg, S.L. (2012). Fast gapped-read alignment with Bowtie 2. *Nat. Methods* *9*,  
965 357–359.
- 966
- 967 Lebeis, S.L., Paredes, S.H., Lundberg, D.S., Breakfield, N., Gehring, J., McDonald, M., Malfatti, S., del  
968 Rio, T.G., Jones, C.D., Tringe, S.G., et al. (2015). Salicylic acid modulates colonization of the root  
969 microbiome by specific bacterial taxa. *Science* *349*, 860–864.
- 970
- 971 Li, H., Handsaker, B., Wysoker, A., Fennell, T., Ruan, J., Homer, N., Marth, G., Abecasis, G., Durbin, R.,  
972 and 1000 Genome Project Data Processing Subgroup (2009). The Sequence Alignment/Map format and  
973 SAMtools. *Bioinformatics* *25*, 2078–2079.
- 974
- 975 Limoli, D.H., Warren, E.A., Yarrington, K.D., Donegan, N.P., Cheung, A.L., and O’Toole, G.A. (2019).  
976 Interspecies interactions induce exploratory motility in *Pseudomonas aeruginosa*. *Elife* *8*.
- 977
- 978 Little, A.E.F., Robinson, C.J., Peterson, S.B., Raffa, K.F., and Handelsman, J. (2008). Rules of  
979 engagement: interspecies interactions that regulate microbial communities. *Annu. Rev. Microbiol.* *62*,  
980 375–401.
- 981
- 982 Lu, J., Breitwieser, F.P., Thielen, P., and Salzberg, S.L. (2017). Bracken: estimating species abundance  
983 in metagenomics data. *PeerJ Computer Science* *3*, e104.
- 984
- 985 Martens, E.C., Kelly, A.G., Tauzin, A.S., and Brumer, H. (2014). The devil lies in the details: how  
986 variations in polysaccharide fine-structure impact the physiology and evolution of gut microbes. *J. Mol.*  
987 *Biol.* *426*, 3851–3865.
- 988
- 989 Martínez, I., Maldonado-Gomez, M.X., Gomes-Neto, J.C., Kittana, H., Ding, H., Schmaltz, R., Joglekar,  
990 P., Cardona, R.J., Marsteller, N.L., Kembel, S.W., et al. (2018). Experimental evaluation of the  
991 importance of colonization history in early-life gut microbiota assembly. *Elife* *7*.
- 992
- 993 Medlock, G.L., Carey, M.A., McDuffie, D.G., Mundy, M.B., Giallourou, N., Swann, J.R., Kolling, G.L., and  
994 Papin, J.A. (2018). Inferring Metabolic Mechanisms of Interaction within a Defined Gut Microbiota. *Cell*  
995 *Syst.* *7*, 245–257.e7.
- 996
- 997 Mee, M.T., Collins, J.J., Church, G.M., and Wang, H.H. (2014). Syntrophic exchange in synthetic  
998 microbial communities. *Proc. Natl. Acad. Sci. USA* *111*, E2149-56.
- 999
- 000 Morris, B.E.L., Henneberger, R., Huber, H., and Moissl-Eichinger, C. (2013). Microbial syntrophy:

- 001 interaction for the common good. *FEMS Microbiol. Rev.* 37, 384–406.  
002
- 003 Müller, B., and Grossniklaus, U. (2010). Model organisms--A historical perspective. *J. Proteomics* 73,  
004 2054–2063.  
005
- 006 Nayfach, S., Rodriguez-Mueller, B., Garud, N., and Pollard, K.S. (2016). An integrated metagenomics  
007 pipeline for strain profiling reveals novel patterns of bacterial transmission and biogeography. *Genome*  
008 *Res.* 26, 1612–1625.  
009
- 010 Nayfach, S., Shi, Z.J., Seshadri, R., Pollard, K.S., and Kyrpides, N.C. (2019). New insights from  
011 uncultivated genomes of the global human gut microbiome. *Nature* 568, 505–510.  
012
- 013 Ng, K.M., Aranda-Díaz, A., Tropini, C., Frankel, M.R., Van Treuren, W., O’Loughlin, C.T., Merrill, B.D.,  
014 Yu, F.B., Pruss, K.M., Oliveira, R.A., et al. (2019). Recovery of the Gut Microbiota after Antibiotics  
015 Depends on Host Diet, Community Context, and Environmental Reservoirs. *Cell Host Microbe* 26, 650–  
016 665.e4.  
017
- 018 Nisman, B. (1954). The Stickland reaction. *Bacteriol Rev* 18, 16–42.  
019
- 020 O’Leary, N.A., Wright, M.W., Brister, J.R., Ciufu, S., Haddad, D., McVeigh, R., Rajput, B., Robbertse, B.,  
021 Smith-White, B., Ako-Adjei, D., et al. (2016). Reference sequence (RefSeq) database at NCBI: current  
022 status, taxonomic expansion, and functional annotation. *Nucleic Acids Res.* 44, D733-45.  
023
- 024 Pacheco, A.R., and Segrè, D. (2019). A multidimensional perspective on microbial interactions. *FEMS*  
025 *Microbiol. Lett.* 366.  
026
- 027 Parks, D.H., Imelfort, M., Skennerton, C.T., Hugenholtz, P., and Tyson, G.W. (2015). CheckM: assessing  
028 the quality of microbial genomes recovered from isolates, single cells, and metagenomes. *Genome Res.*  
029 25, 1043–1055.  
030
- 031 Parks, D.H., Chuvochina, M., Waite, D.W., Rinke, C., Skarshewski, A., Chaumeil, P.-A., and Hugenholtz,  
032 P. (2018). A standardized bacterial taxonomy based on genome phylogeny substantially revises the tree  
033 of life. *Nat. Biotechnol.* 36, 996–1004.  
034
- 035 Parks, D.H., Chuvochina, M., Chaumeil, P.-A., Rinke, C., Mussig, A.J., and Hugenholtz, P. (2020). A  
036 complete domain-to-species taxonomy for Bacteria and Archaea. *Nat. Biotechnol.* 38, 1079–1086.  
037
- 038 Patnode, M.L., Beller, Z.W., Han, N.D., Cheng, J., Peters, S.L., Terrapon, N., Henrissat, B., Le Gall, S.,  
039 Saulnier, L., Hayashi, D.K., et al. (2019). Interspecies Competition Impacts Targeted Manipulation of  
040 Human Gut Bacteria by Fiber-Derived Glycans. *Cell* 179, 59–73.e13.  
041
- 042 Qin, J., Li, R., Raes, J., Arumugam, M., Burgdorf, K.S., Manichanh, C., Nielsen, T., Pons, N., Levenez,  
043 F., Yamada, T., et al. (2010). A human gut microbial gene catalogue established by metagenomic  
044 sequencing. *Nature* 464, 59–65.  
045
- 046 Qin, M., Wu, S., Li, A., Zhao, F., Feng, H., Ding, L., Chang, Y., and Ruan, J. (2018). Lrscf: improving  
047 draft genomes using long noisy reads. *BioRxiv*.  
048
- 049 Ridaura, V.K., Faith, J.J., Rey, F.E., Cheng, J., Duncan, A.E., Kau, A.L., Griffin, N.W., Lombard, V.,  
050 Henrissat, B., Bain, J.R., et al. (2013). Gut microbiota from twins discordant for obesity modulate  
051 metabolism in mice. *Science* 341, 1241214.  
052
- 053 Routy, B., Le Chatelier, E., Derosa, L., Duong, C.P.M., Alou, M.T., Daillère, R., Fluckiger, A.,

- 054 Messaoudene, M., Rauber, C., Roberti, M.P., et al. (2018). Gut microbiome influences efficacy of PD-1-  
055 based immunotherapy against epithelial tumors. *Science* 359, 91–97.  
056
- 057 Sanchez-Gorostiaga, A., Bajić, D., Osborne, M.L., Poyatos, J.F., and Sanchez, A. (2019). High-order  
058 interactions distort the functional landscape of microbial consortia. *PLoS Biol.* 17, e3000550.  
059
- 060 Shank, E.A., and Kolter, R. (2009). New developments in microbial interspecies signaling. *Curr. Opin.*  
061 *Microbiol.* 12, 205–214.  
062
- 063 Shen, W., Le, S., Li, Y., and Hu, F. (2016). SeqKit: A Cross-Platform and Ultrafast Toolkit for FASTA/Q  
064 File Manipulation. *PLoS One* 11, e0163962.  
065
- 066 Sinha, R., Stanley, G., Gulati, G.S., Ezran, C., Travaglini, K.J., Wei, E., Chan, C.K.F., Nabhan, A.N., Su,  
067 T., Morganti, R.M., et al. (2017). Index switching causes “spreading-of-signal” among multiplexed  
068 samples in Illumina HiSeq 4000 DNA sequencing. *BioRxiv*.  
069
- 070 Smith, E.A., and Macfarlane, G.T. (1997). Dissimilatory amino Acid metabolism in human colonic  
071 bacteria. *Anaerobe* 3, 327–337.  
072
- 073 Sonnenburg, E.D., and Sonnenburg, J.L. (2019). The ancestral and industrialized gut microbiota and  
074 implications for human health. *Nat. Rev. Microbiol.* 17, 383–390.  
075
- 076 Sonnenburg, E.D., Zheng, H., Joglekar, P., Higginbottom, S.K., Firbank, S.J., Bolam, D.N., and  
077 Sonnenburg, J.L. (2010). Specificity of polysaccharide use in intestinal bacteroides species determines  
078 diet-induced microbiota alterations. *Cell* 141, 1241–1252.  
079
- 080 Soto-Martin, E.C., Warnke, I., Farquharson, F.M., Christodoulou, M., Horgan, G., Derrien, M., Faurie, J.-  
081 M., Flint, H.J., Duncan, S.H., and Louis, P. (2020). Vitamin Biosynthesis by Human Gut Butyrate-  
082 Producing Bacteria and Cross-Feeding in Synthetic Microbial Communities. *MBio* 11.  
083
- 084 Titus Brown, C., and Irber, L. (2016). sourmash: a library for MinHash sketching of DNA. *JOSS* 1.  
085
- 086 Traxler, M.F., Watrous, J.D., Alexandrov, T., Dorrestein, P.C., and Kolter, R. (2013). Interspecies  
087 interactions stimulate diversification of the *Streptomyces coelicolor* secreted metabolome. *MBio* 4.  
088
- 089 Truong, D.T., Franzosa, E.A., Tickle, T.L., Scholz, M., Weingart, G., Pasolli, E., Tett, A., Huttenhower, C.,  
090 and Segata, N. (2015). MetaPhlan2 for enhanced metagenomic taxonomic profiling. *Nat. Methods* 12,  
091 902–903.  
092
- 093 Venugopal, V., and Nadkarni, G.B. (1977). Regulation of the arginine dihydrolase pathway in *Clostridium*  
094 *sporogenes*. *J. Bacteriol.* 131, 693–695.  
095
- 096 Vetsigian, K., Jajoo, R., and Kishony, R. (2011). Structure and evolution of *Streptomyces* interaction  
097 networks in soil and in silico. *PLoS Biol.* 9, e1001184.  
098
- 099 Walter, J., Maldonado-Gómez, M.X., and Martínez, I. (2018). To engraft or not to engraft: an ecological  
100 framework for gut microbiome modulation with live microbes. *Curr. Opin. Biotechnol.* 49, 129–139.  
101
- 102 Wexler, A.G., and Goodman, A.L. (2017). An insider’s perspective: *Bacteroides* as a window into the  
103 microbiome. *Nat. Microbiol.* 2, 17026.  
104
- 105 Wick, R.R., Judd, L.M., Gorrie, C.L., and Holt, K.E. (2017). Unicycler: Resolving bacterial genome  
106 assemblies from short and long sequencing reads. *PLoS Comput. Biol.* 13, e1005595.

107

108 Widder, S., Allen, R.J., Pfeiffer, T., Curtis, T.P., Wiuf, C., Sloan, W.T., Cordero, O.X., Brown, S.P.,  
109 Momeni, B., Shou, W., et al. (2016). Challenges in microbial ecology: building predictive understanding  
110 of community function and dynamics. *ISME J.* 10, 2557–2568.

111

112 Wildenauer, F.X., and Winter, J. (1986). Fermentation of isoleucine and arginine by pure and syntrophic  
113 cultures of *Clostridium sporogenes*. *FEMS Microbiol. Lett.* 38, 373–379.

114

115 Wood, D.E., Lu, J., and Langmead, B. (2019). Improved metagenomic analysis with Kraken 2. *Genome*  
116 *Biol.* 20, 257.

117

118 Xavier, J.B. (2011). Social interaction in synthetic and natural microbial communities. *Mol. Syst. Biol.* 7,  
119 483.

120

121 Xu, M., Guo, L., Gu, S., Wang, O., Zhang, R., Fan, G., Xu, X., Deng, L., and Liu, X. (2019). TGS-  
122 GapCloser: fast and accurately passing through the Bermuda in large genome using error-prone third-  
123 generation long reads. *BioRxiv*.

124

125 Yurtsev, E.A., Conwill, A., and Gore, J. (2016). Oscillatory dynamics in a bacterial cross-protection  
126 mutualism. *Proc. Natl. Acad. Sci. USA* 113, 6236–6241.

127

128 Ze, X., Duncan, S.H., Louis, P., and Flint, H.J. (2012). *Ruminococcus bromii* is a keystone species for  
129 the degradation of resistant starch in the human colon. *ISME J.* 6, 1535–1543.

130

131 Ziesack, M., Gibson, T., Oliver, J.K.W., Shumaker, A.M., Hsu, B.B., Riglar, D.T., Giessen, T.W.,  
132 DiBenedetto, N.V., Bry, L., Way, J.C., et al. (2019). Engineered Interspecies Amino Acid Cross-Feeding  
133 Increases Population Evenness in a Synthetic Bacterial Consortium. *MSystems* 4.

134

135 Zipperer, A., Konnerth, M.C., Laux, C., Berscheid, A., Janek, D., Weidenmaier, C., Burian, M., Schilling,  
136 N.A., Slavetinsky, C., Marschal, M., et al. (2016). Human commensals producing a novel antibiotic impair  
137 pathogen colonization. *Nature* 535, 511–516.

138
